# Supplementary material for: Photophysical properties of N-methyl and N-acetyl substituted alloxazines: a theoretical investigation
Source: Royal Society of Chemistry journal article supplement (doi:10.1039/d1cp01201k), 2021-01-01
Supplement: d1cp01201k1.pdf [file d1cp01201k1.pdf]

## Supporting Information for

# Photophysical Properties of *N*-Methyl and *N*-Acetyl Substituted Alloxazine: A Theoretical Investigation

*Huimin Guo*<sup>†,\*</sup>, *Xiaolin Ma*<sup>†</sup>, *Zhiwen Lei*<sup>†</sup>, *Yang Qiu*<sup>†</sup>, *Jianzhang Zhao*<sup>†</sup>, *Bernhard*

*Dick*<sup>‡</sup>

<sup>†</sup> State Key Laboratory of Fine Chemicals, Department of Chemistry, Dalian University of Technology, No. 2, Linggong Road, Dalian, 116024, P. R. China.

<sup>‡</sup> Institut für Physikalische und Theoretische Chemie, Universität Regensburg, Universitätsstr. 31, Regensburg, 93053, Germany

KEYWORDS: Photophysics; Alloxazine; Intersystem Crossing; Internal Conversion; Absorption Spectrum; Emission Spectrum; Flavin.

---

\* Corresponding authors, email: [guohm@dlut.edu.cn](mailto:guohm@dlut.edu.cn) (H. G.)

## Theoretical Methods

Density Functional Theory (DFT) and Time-dependent Density Functional Theory (TD-DFT) based calculations were performed to investigate the photophysical properties of these compounds. Structures of the  $S_0$  states of these compounds were fully optimized with the B3LYP functional with 6-311G(d) basis sets unless specified.<sup>1-5</sup> Benchmark calculations were also performed for Az and AAz1 at B3LYP/Def2TZVP level.<sup>6, 7</sup> TD-DFT calculations at the same level of theory were performed to get the fully relaxed  $S_1$  and  $T_1$  structures. All reported structures were verified with frequency calculations to be local minima on the corresponding potential energy surface. These calculations were performed with Gaussian 16.<sup>8</sup>

The transition dipole moments from  $T_1$  to  $S_0$  are evaluated from the quadratic response function<sup>9-11</sup> and the spin-orbit coupling matrix elements are computed at the same level of theory using the effective single-electron approximation in linear response theory with the Dalton program.<sup>12-14</sup>

The absorption, fluorescence and phosphorescence spectra of compounds, together with the radiative and non-radiative decay rate constants were calculated using MOMAP.<sup>15-20</sup> The absorption and fluorescence spectra were calculated according to eq-S1 and 2:

$$\sigma(\omega)_{abs} = \frac{4\pi^2\omega}{3\hbar c} \times \sum_{v_i, v_f} P_{iv_i}(T) \left| \langle \Theta_{f, v_f} | \mu_{fi} | \Theta_{i, v_i} \rangle \right|^2 \delta(\omega - \omega_{f, v_f, i, v_i}) \quad (\text{eq-S1})$$

$$\sigma(\omega)_{emi} = \frac{4\omega^3}{3\hbar c} \times \sum_{v_i, v_f} P_{iv_i}(T) \left| \langle \Theta_{f, v_f} | \mu_{fi} | \Theta_{i, v_i} \rangle \right|^2 \delta(\omega_{i, v_i, f, v_f} - \omega) \quad (\text{eq-S2})$$

where  $P_{iv_i}(T)$  is the Boltzmann population of the vibrational manifolds in the initial state,  $\mu_{fi} = \langle \Phi_f | \mu | \Phi_i \rangle$  is the electronic transition dipole moment between the

initial state  $i$  and final state  $f$  calculated according to the Frank-Condon approximation,  $v_i/v_f$  is vibrational quantum number of state  $i/f$ ,  $\omega$  is the radiation frequency and  $\omega_{i,v_i,f,v_f} = \omega_{f,v_f} - \omega_{i,v_i}$ , respectively. The absorption and emission rate constants were calculated as the integration of the spectra.<sup>20-23</sup>

For the non-radiative decay, applying the second-order perturbation approximation, the rate constants were calculated as:

$$k_{f \leftarrow i} = \frac{2\pi}{\hbar} \sum_{v_i, v_f} P_{iv_i} \left| H'_{fv_f, iv_i} + \sum_{n, v_n} \frac{H'_{fv_f, nv_n} H'_{nv_n, iv_i}}{E_{iv_i} - E_{nv_n}} \right|^2 \times \delta(E_{iv_i} - E_{fv_f}) \quad (\text{eq-S3})$$

where,  $v_i/v_f$  is vibrational quantum number of state  $i/f$  and  $H'$  is the interaction between 2 different Born-Oppenheimer states and calculated as  $H'\psi_{iv_i} = H^{NA}\Phi_i(r:Q)\Theta_{iv_i}(Q) + H^{SO}\Phi_i(r:Q)\Theta_{iv_i}(Q)$ , where  $H^{NA}$  is the non-adiabatic coupling operator,  $H^{SO}$  is the spin-orbital coupling operator,  $r$  and  $Q$  are the electronic and nuclear normal mode coordinates.<sup>24</sup>

The transition dipole moment for phosphorescence was calculated as eq-S4:

$$\mu_{ST\kappa} = \sum_k^{\{singlets\}} \frac{\langle S|\mu|{}^1k\rangle \langle {}^1k|H^{SO}|T\kappa\rangle}{{}^3E_T^0 - {}^1E_k^0} + \sum_n^{\{triplets\}} \sum_{\kappa'=1}^3 \frac{\langle S|H^{SO}|{}^3n_{\kappa'}\rangle \langle {}^3n_{\kappa'}|\mu|T\kappa\rangle}{{}^1E_S^0 - {}^3E_n^0} \quad (\text{eq-S4})$$

where  $\kappa$  is the magnetic quantum number,  $n$  and  $k$  are the intermediate triplet and singlet electronic states, respectively. Applying the Franck-Condon approximation, the phosphorescence spectra were calculated as eq-S5<sup>19</sup>:

$$\sigma_{ph}(\omega, T) = \frac{4\omega^3}{3\hbar c^3} \times \sum_{v_i, v_f} P_{iv_i}(T) \left| \langle \Theta_{f, v_f} | \mu_{ST} | \Theta_{i, v_i} \rangle \right|^2 \delta(\omega_{i, v_i, f, v_f} - \omega) \quad (\text{eq-S5})$$

The radiative decay rate constant was calculated as the integration of the phosphorescence spectra.

The intersystem crossing rate constant can be calculated as:

$$k_{isc} = k_{isc}^{(0)} + k_{isc}^{(1)} + k_{isc}^{(2)} \quad (\text{eq-S6})$$

where:

$$k_{isc}^{(0)} = \frac{2\pi}{\hbar} \sum_{v_i, v_f} P_{iv_i} \left| H'_{fv_f, iv_i} \right|^2 \times \delta(E_{iv_i} - E_{fv_f}) \quad (\text{eq-S7})$$

$$k_{isc}^{(1)} = \frac{2\pi}{\hbar} \sum_{v_i, v_f} P_{iv_i} 2\text{Re} \left( H'_{fv_f, iv_i} \sum_{n, v_n} \frac{H'_{fv_f, nv_n} H'_{nv_n, iv_i}}{E_{iv_i} - E_{nv_n}} \right) \times \delta(E_{iv_i} - E_{fv_f}) \quad (\text{eq-S8})$$

$$k_{isc}^{(2)} = \frac{2\pi}{\hbar} \sum_{v_i, v_f} P_{iv_i} \left| \sum_{n, v_n} \frac{H'_{fv_f, nv_n} H'_{nv_n, iv_i}}{E_{iv_i} - E_{nv_n}} \right|^2 \times \delta(E_{iv_i} - E_{fv_f}) \quad (\text{eq-S9})$$

More details on calculation of these spectra and rate constants can be found in Ref. 15-24.

Natural Transition Orbital (NTO) analysis was performed to understand the electron transitions involved in absorption with Multiwfn and Gaussian 16.<sup>8, 25</sup> The polarizable continuum model (PCM) was applied to take into account the electrostatic interaction with the solvent.<sup>26-28</sup>

**Table S1.** Electronic transitions involved in the excitation of Az in visible light region.

| No.                             | Energy              | f <sup>a</sup> | Composition <sup>b</sup> | CI <sup>c</sup> | Character                                     |
|---------------------------------|---------------------|----------------|--------------------------|-----------------|-----------------------------------------------|
| S <sub>0</sub> →S <sub>1</sub>  | 3.4254 eV/361.96 nm | 0.0842         | 55→56                    | 0.69357         | $\pi \rightarrow \pi^*$ $n \rightarrow \pi^*$ |
| S <sub>0</sub> →S <sub>2</sub>  | 3.4586 eV/358.48 nm | 0.0017         | 52→56                    | 0.11814         | $\pi \rightarrow \pi^*$                       |
|                                 |                     |                | 53→56                    | 0.69307         | $n \rightarrow \pi^*$                         |
| S <sub>0</sub> →S <sub>3</sub>  | 3.9272 eV/315.70 nm | 0.2381         | 54→56                    | 0.67168         | $\pi \rightarrow \pi^*$                       |
|                                 |                     |                | 55→57                    | 0.18574         | $n \rightarrow \pi^*$                         |
| S <sub>0</sub> →S <sub>4</sub>  | 4.0849 eV/303.51 nm | 0.0001         | 50→56                    | 0.14401         | $\pi \rightarrow \pi^*$                       |
|                                 |                     |                | 52→56                    | 0.67067         | $n \rightarrow \pi^*$                         |
|                                 |                     |                | 53→56                    | 0.10483         |                                               |
| S <sub>0</sub> →S <sub>5</sub>  | 4.8262 eV/256.90 nm | 0.0338         | 49→56                    | 0.12590         | $\pi \rightarrow \pi^*$                       |
|                                 |                     |                | 51→56                    | 0.64667         | $n \rightarrow \pi^*$                         |
|                                 |                     |                | 55→57                    | 0.22269         |                                               |
| S <sub>0</sub> →S <sub>6</sub>  | 4.9392 eV/251.02 nm | 0.0000         | 50→56                    | 0.49943         | $\pi \rightarrow \pi^*$                       |
|                                 |                     |                | 52→56                    | 0.12683         | $n \rightarrow \pi^*$                         |
|                                 |                     |                | 53→57                    | 0.45775         |                                               |
| S <sub>0</sub> →S <sub>7</sub>  | 4.9990 eV/248.02 nm | 0.0000         | 48→56                    | 0.17662         | $\pi \rightarrow \pi^*$                       |
|                                 |                     |                | 50→56                    | 0.45534         | $n \rightarrow \pi^*$                         |
|                                 |                     |                | 52→57                    | 0.15259         |                                               |
|                                 |                     |                | 53→57                    | 0.47402         |                                               |
| S <sub>0</sub> →S <sub>8</sub>  | 5.0343 eV/246.28 nm | 0.4939         | 49→56                    | 0.37870         | $\pi \rightarrow \pi^*$                       |
|                                 |                     |                | 51→56                    | 0.23143         | $n \rightarrow \pi^*$                         |
|                                 |                     |                | 54→56                    | 0.11624         |                                               |
|                                 |                     |                | 54→57                    | 0.21190         |                                               |
| S <sub>0</sub> →S <sub>9</sub>  | 5.1331 eV/241.54 nm | 0.0000         | 55→57                    | 0.47419         |                                               |
|                                 |                     |                | 48→56                    | 0.66816         | $\pi \rightarrow \pi^*$                       |
|                                 |                     |                | 53→57                    | 0.18788         | $n \rightarrow \pi^*$                         |
| S <sub>0</sub> →S <sub>10</sub> | 5.2824 eV/234.71 nm | 0.2835         | 49→56                    | 0.27255         | $\pi \rightarrow \pi^*$                       |
|                                 |                     |                | 51→56                    | 0.13267         | $n \rightarrow \pi^*$                         |
|                                 |                     |                | 54→57                    | 0.47179         |                                               |
|                                 |                     |                | 55→57                    | 0.37221         |                                               |
|                                 |                     |                | 55→58                    | 0.13761         |                                               |
| S <sub>0</sub> →S <sub>11</sub> | 5.4229 eV/228.63 nm | 0.4391         | 49→56                    | 0.49042         | $\pi \rightarrow \pi^*$                       |
|                                 |                     |                | 54→56                    | 0.12126         | $n \rightarrow \pi^*$                         |
|                                 |                     |                | 54→57                    | 0.34128         |                                               |
|                                 |                     |                | 55→57                    | 0.17914         |                                               |
|                                 |                     |                | 55→58                    | 0.26725         |                                               |
| S <sub>0</sub> →S <sub>12</sub> | 5.7341 eV/216.22 nm | 0.0001         | 50→56                    | 0.10283         | $\pi \rightarrow \pi^*$                       |
|                                 |                     |                | 52→57                    | 0.66139         | $n \rightarrow \pi^*$                         |
|                                 |                     |                | 53→57                    | 0.13585         |                                               |
| S <sub>0</sub> →S <sub>13</sub> | 5.9634 eV/207.91 nm | 0.1274         | 47→56                    | 0.11716         | $\pi \rightarrow \pi^*$                       |
|                                 |                     |                | 54→57                    | 0.25157         | $n \rightarrow \pi^*$                         |
|                                 |                     |                | 54→58                    | 0.10061         |                                               |
|                                 |                     |                | 54→59                    | 0.17777         |                                               |
|                                 |                     |                | 55→58                    | 0.58308         |                                               |
| S <sub>0</sub> →S <sub>14</sub> | 6.0553 eV/204.75 nm | 0.0004         | 50→57                    | 0.16242         | $\pi \rightarrow \pi^*$                       |
|                                 |                     |                | 52→57                    | 0.10823         | $n \rightarrow \pi^*$                         |
|                                 |                     |                | 52→59                    | 0.16149         |                                               |
|                                 |                     |                | 53→58                    | 0.62813         |                                               |
|                                 |                     |                | 53→59                    | 0.14678         |                                               |
| S <sub>0</sub> →S <sub>15</sub> | 6.2259 eV/199.14 nm | 0.0010         | 50→57                    | 0.29150         | $\pi \rightarrow \pi^*$                       |
|                                 |                     |                | 52→58                    | 0.32192         | $n \rightarrow \pi^*$                         |
|                                 |                     |                | 52→59                    | 0.11116         |                                               |
|                                 |                     |                | 53→58                    | 0.23136         |                                               |
| S <sub>0</sub> →S <sub>16</sub> | 6.2289 eV/199.05 nm | 0.1149         | 53→59                    | 0.45758         |                                               |
|                                 |                     |                | 51→57                    | 0.17187         | $\pi \rightarrow \pi^*$                       |
|                                 |                     |                | 55→59                    | 0.64760         | $n \rightarrow \pi^*$                         |

|                          |                     |        |                     |         |                         |
|--------------------------|---------------------|--------|---------------------|---------|-------------------------|
| $S_0 \rightarrow S_{17}$ | 6.3289 eV/195.90 nm | 0.0146 | 47 $\rightarrow$ 56 | 0.11789 | $\pi \rightarrow \pi^*$ |
|                          |                     |        | 51 $\rightarrow$ 57 | 0.65773 | $n \rightarrow \pi^*$   |
|                          |                     |        | 54 $\rightarrow$ 58 | 0.10568 |                         |
|                          |                     |        | 55 $\rightarrow$ 59 | 0.14091 |                         |
| $S_0 \rightarrow S_{18}$ | 6.3513 eV/195.21 nm | 0.2455 | 47 $\rightarrow$ 56 | 0.23526 | $\pi \rightarrow \pi^*$ |
|                          |                     |        | 49 $\rightarrow$ 57 | 0.19846 | $n \rightarrow \pi^*$   |
|                          |                     |        | 51 $\rightarrow$ 57 | 0.13639 |                         |
|                          |                     |        | 54 $\rightarrow$ 58 | 0.55930 |                         |
|                          |                     |        | 55 $\rightarrow$ 58 | 0.14735 |                         |
|                          |                     |        | 55 $\rightarrow$ 59 | 0.14771 |                         |
| $S_0 \rightarrow S_{19}$ | 6.4828 eV/191.25 nm | 0.0005 | 50 $\rightarrow$ 57 | 0.56095 | $\pi \rightarrow \pi^*$ |
|                          |                     |        | 53 $\rightarrow$ 59 | 0.37036 | $n \rightarrow \pi^*$   |
| $S_0 \rightarrow S_{20}$ | 6.6086 eV/187.61 nm | 0.0009 | 46 $\rightarrow$ 56 | 0.67435 | $\pi \rightarrow \pi^*$ |
| $S_0 \rightarrow T_1$    | 2.5212 eV/491.76 nm | 0.0000 | 53 $\rightarrow$ 59 | 0.14710 | $n \rightarrow \pi^*$   |
|                          |                     |        | 54 $\rightarrow$ 56 | 0.25642 | $\pi \rightarrow \pi^*$ |
|                          |                     |        | 54 $\rightarrow$ 58 | 0.10212 | $n \rightarrow \pi^*$   |
| $S_0 \rightarrow T_2$    | 2.8926 eV/428.63 nm | 0.0000 | 55 $\rightarrow$ 56 | 0.62402 |                         |
|                          |                     |        | 55 $\rightarrow$ 57 | 0.14191 |                         |
|                          |                     |        | 54 $\rightarrow$ 56 | 0.62172 | $\pi \rightarrow \pi^*$ |
| $S_0 \rightarrow T_3$    | 2.9682 eV/417.71 nm | 0.0000 | 55 $\rightarrow$ 56 | 0.29624 | $n \rightarrow \pi^*$   |
|                          |                     |        | 52 $\rightarrow$ 56 | 0.23021 | $\pi \rightarrow \pi^*$ |
| $S_0 \rightarrow T_4$    | 3.7396 eV/331.54 nm | 0.0000 | 53 $\rightarrow$ 56 | 0.64965 | $n \rightarrow \pi^*$   |
|                          |                     |        | 48 $\rightarrow$ 56 | 0.10728 | $\pi \rightarrow \pi^*$ |
| $S_0 \rightarrow T_5$    | 3.8940 eV/318.40 nm | 0.0000 | 50 $\rightarrow$ 56 | 0.18638 | $n \rightarrow \pi^*$   |
|                          |                     |        | 52 $\rightarrow$ 56 | 0.59937 |                         |
|                          |                     |        | 53 $\rightarrow$ 56 | 0.22494 |                         |
|                          |                     |        | 51 $\rightarrow$ 56 | 0.10904 | $\pi \rightarrow \pi^*$ |
|                          |                     |        | 54 $\rightarrow$ 56 | 0.16379 | $n \rightarrow \pi^*$   |
|                          |                     |        | 54 $\rightarrow$ 57 | 0.13378 |                         |
|                          |                     |        | 55 $\rightarrow$ 56 | 0.10803 |                         |
|                          |                     |        | 55 $\rightarrow$ 57 | 0.63844 |                         |

<sup>a</sup> Oscillator strength. It is zero for  $S_0 \rightarrow T_n$  transitions.

<sup>b</sup> Only the main configurations are presented.

<sup>c</sup> The CI coefficients are in absolute values.

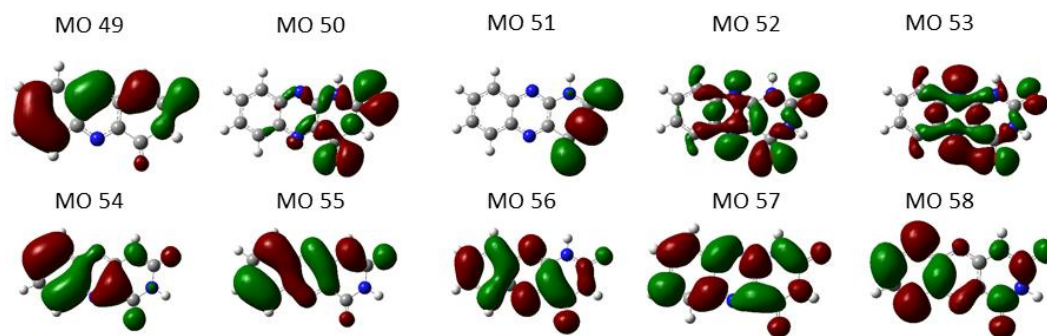

**Figure S1.** Contour plots of wavefunction of states of Az involved in absorption in visible light region. The C, O, N and H are in gray, red, blue and white, respectively. The isovalue is  $\pm 0.02$  a.u.

**Table S2.** Electronic transitions involved in the excitation of AAz1 in visible light region.

| No.                      | Energy              | $f^a$  | Composition <sup>b</sup> | CI <sup>c</sup> | Character               |
|--------------------------|---------------------|--------|--------------------------|-----------------|-------------------------|
| $S_0 \rightarrow S_1$    | 3.4121 eV/363.36 nm | 0.0707 | 64→67                    | 0.12313         | $\pi \rightarrow \pi^*$ |
|                          |                     |        | 66→67                    | 0.68101         | $n \rightarrow \pi^*$   |
| $S_0 \rightarrow S_2$    | 3.4405 eV/360.36 nm | 0.0052 | 64→67                    | 0.68184         | $\pi \rightarrow \pi^*$ |
|                          |                     |        | 66→67                    | 0.13114         | $n \rightarrow \pi^*$   |
| $S_0 \rightarrow S_3$    | 3.9028 eV/317.68 nm | 0.2356 | 65→67                    | 0.66754         | $\pi \rightarrow \pi^*$ |
|                          |                     |        | 66→68                    | 0.17660         | $n \rightarrow \pi^*$   |
| $S_0 \rightarrow S_4$    | 4.0630 eV/305.15 nm | 0.0009 | 61→67                    | 0.18013         | $\pi \rightarrow \pi^*$ |
|                          |                     |        | 63→67                    | 0.65556         | $n \rightarrow \pi^*$   |
| $S_0 \rightarrow S_5$    | 4.6598 eV/266.07 nm | 0.0027 | 61→69                    | 0.16824         | $\pi \rightarrow \pi^*$ |
|                          |                     |        | 63→69                    | 0.10531         | $n \rightarrow \pi^*$   |
|                          |                     |        | 65→69                    | 0.15049         |                         |
|                          |                     |        | 66→68                    | 0.19022         |                         |
| $S_0 \rightarrow S_6$    | 4.7605 eV/260.44 nm | 0.0288 | 66→69                    | 0.61642         |                         |
|                          |                     |        | 61→67                    | 0.38604         | $\pi \rightarrow \pi^*$ |
|                          |                     |        | 62→67                    | 0.49011         | $n \rightarrow \pi^*$   |
|                          |                     |        | 63→67                    | 0.16907         |                         |
|                          |                     |        | 66→68                    | 0.22632         |                         |
| $S_0 \rightarrow S_7$    | 4.8742 eV/254.37 nm | 0.0186 | 66→69                    | 0.10103         |                         |
|                          |                     |        | 60→67                    | 0.22247         | $\pi \rightarrow \pi^*$ |
|                          |                     |        | 61→67                    | 0.48502         | $n \rightarrow \pi^*$   |
|                          |                     |        | 62→67                    | 0.36631         |                         |
|                          |                     |        | 63→67                    | 0.14575         |                         |
|                          |                     |        | 64→68                    | 0.11024         |                         |
| $S_0 \rightarrow S_8$    | 4.9218 eV/251.91 nm | 0.0041 | 65→68                    | 0.10348         |                         |
|                          |                     |        | 66→68                    | 0.14529         |                         |
|                          |                     |        | 58→67                    | 0.16088         | $\pi \rightarrow \pi^*$ |
|                          |                     |        | 61→67                    | 0.12510         | $n \rightarrow \pi^*$   |
|                          |                     |        | 64→68                    | 0.64414         |                         |
| $S_0 \rightarrow S_9$    | 5.0037 eV/247.78 nm | 0.0470 | 59→69                    | 0.16965         | $\pi \rightarrow \pi^*$ |
|                          |                     |        | 60→67                    | 0.14756         | $n \rightarrow \pi^*$   |
|                          |                     |        | 61→69                    | 0.32151         |                         |
|                          |                     |        | 62→69                    | 0.10951         |                         |
|                          |                     |        | 63→69                    | 0.30860         |                         |
|                          |                     |        | 64→69                    | 0.36317         |                         |
| $S_0 \rightarrow S_{10}$ | 5.0131 eV/247.32 nm | 0.3033 | 66→68                    | 0.17351         |                         |
|                          |                     |        | 66→69                    | 0.16571         |                         |
|                          |                     |        | 59→67                    | 0.13792         | $\pi \rightarrow \pi^*$ |
|                          |                     |        | 60→67                    | 0.38761         | $n \rightarrow \pi^*$   |
|                          |                     |        | 61→69                    | 0.10549         |                         |
|                          |                     |        | 62→67                    | 0.26200         |                         |
|                          |                     |        | 63→69                    | 0.12308         |                         |
|                          |                     |        | 64→69                    | 0.12712         |                         |
| $S_0 \rightarrow S_{11}$ | 5.1036 eV/242.93 nm | 0.1427 | 65→68                    | 0.20444         |                         |
|                          |                     |        | 66→68                    | 0.32619         |                         |
|                          |                     |        | 66→69                    | 0.16571         |                         |
|                          |                     |        | 58→67                    | 0.35711         | $\pi \rightarrow \pi^*$ |
|                          |                     |        | 59→67                    | 0.31602         | $n \rightarrow \pi^*$   |
| $S_0 \rightarrow S_{12}$ | 5.1551 eV/240.51 nm | 0.1407 | 60→67                    | 0.37793         |                         |
|                          |                     |        | 64→68                    | 0.16352         |                         |
|                          |                     |        | 66→68                    | 0.23387         |                         |
|                          |                     |        | 58→67                    | 0.56107         | $\pi \rightarrow \pi^*$ |
|                          |                     |        | 59→67                    | 0.11570         | $n \rightarrow \pi^*$   |
|                          |                     |        | 60→67                    | 0.25042         |                         |
|                          |                     |        | 61→67                    | 0.14304         |                         |
|                          |                     |        | 66→68                    | 0.21933         |                         |

|                          |                     |        |                     |         |                         |
|--------------------------|---------------------|--------|---------------------|---------|-------------------------|
| $S_0 \rightarrow S_{13}$ | 5.2513 eV/236.10 nm | 0.1850 | 59 $\rightarrow$ 67 | 0.33719 | $\pi \rightarrow \pi^*$ |
|                          |                     |        | 62 $\rightarrow$ 67 | 0.12399 | $n \rightarrow \pi^*$   |
|                          |                     |        | 65 $\rightarrow$ 68 | 0.47193 |                         |
|                          |                     |        | 66 $\rightarrow$ 68 | 0.26723 |                         |
|                          |                     |        | 66 $\rightarrow$ 70 | 0.13629 |                         |
| $S_0 \rightarrow S_{14}$ | 5.3946 eV/229.83 nm | 0.2914 | 59 $\rightarrow$ 67 | 0.41935 | $\pi \rightarrow \pi^*$ |
|                          |                     |        | 60 $\rightarrow$ 67 | 0.17170 | $n \rightarrow \pi^*$   |
|                          |                     |        | 65 $\rightarrow$ 67 | 0.10072 |                         |
|                          |                     |        | 65 $\rightarrow$ 68 | 0.33576 |                         |
|                          |                     |        | 65 $\rightarrow$ 69 | 0.27067 |                         |
|                          |                     |        | 66 $\rightarrow$ 68 | 0.15528 |                         |
| $S_0 \rightarrow S_{15}$ | 5.4348 eV/228.13 nm | 0.0967 | 66 $\rightarrow$ 70 | 0.18144 |                         |
|                          |                     |        | 59 $\rightarrow$ 67 | 0.20590 | $\pi \rightarrow \pi^*$ |
|                          |                     |        | 64 $\rightarrow$ 69 | 0.21080 | $n \rightarrow \pi^*$   |
|                          |                     |        | 65 $\rightarrow$ 69 | 0.58517 |                         |
|                          |                     |        | 66 $\rightarrow$ 69 | 0.12806 |                         |
| $S_0 \rightarrow S_{16}$ | 5.4883 eV/225.90 nm | 0.0008 | 66 $\rightarrow$ 70 | 0.15009 |                         |
|                          |                     |        | 61 $\rightarrow$ 69 | 0.24678 | $\pi \rightarrow \pi^*$ |
|                          |                     |        | 63 $\rightarrow$ 68 | 0.11208 | $n \rightarrow \pi^*$   |
|                          |                     |        | 63 $\rightarrow$ 69 | 0.28860 |                         |
|                          |                     |        | 64 $\rightarrow$ 69 | 0.51985 |                         |
| $S_0 \rightarrow S_{17}$ | 5.6833 eV/218.15 nm | 0.0004 | 65 $\rightarrow$ 69 | 0.18363 |                         |
|                          |                     |        | 61 $\rightarrow$ 68 | 0.10578 | $\pi \rightarrow \pi^*$ |
|                          |                     |        | 63 $\rightarrow$ 68 | 0.64299 | $n \rightarrow \pi^*$   |
|                          |                     |        | 63 $\rightarrow$ 69 | 0.14145 |                         |
|                          |                     |        | 57 $\rightarrow$ 67 | 0.11613 | $\pi \rightarrow \pi^*$ |
| $S_0 \rightarrow S_{18}$ | 5.9370 eV/208.83 nm | 0.0668 | 65 $\rightarrow$ 68 | 0.20593 | $n \rightarrow \pi^*$   |
|                          |                     |        | 65 $\rightarrow$ 71 | 0.17004 |                         |
|                          |                     |        | 66 $\rightarrow$ 70 | 0.59528 |                         |
|                          |                     |        | 66 $\rightarrow$ 71 | 0.11436 |                         |
|                          |                     |        | 60 $\rightarrow$ 68 | 0.10416 | $\pi \rightarrow \pi^*$ |
| $S_0 \rightarrow S_{19}$ | 6.0319 eV/205.55 nm | 0.0008 | 60 $\rightarrow$ 69 | 0.11573 | $n \rightarrow \pi^*$   |
|                          |                     |        | 61 $\rightarrow$ 68 | 0.15245 |                         |
|                          |                     |        | 61 $\rightarrow$ 69 | 0.13737 |                         |
|                          |                     |        | 63 $\rightarrow$ 69 | 0.22399 |                         |
|                          |                     |        | 63 $\rightarrow$ 71 | 0.15806 |                         |
|                          |                     |        | 64 $\rightarrow$ 70 | 0.53247 |                         |
|                          |                     |        | 64 $\rightarrow$ 71 | 0.12521 |                         |
|                          |                     |        | 59 $\rightarrow$ 69 | 0.15008 | $\pi \rightarrow \pi^*$ |
|                          |                     |        | 60 $\rightarrow$ 69 | 0.21026 | $n \rightarrow \pi^*$   |
| $S_0 \rightarrow T_1$    | 2.5224 eV/491.54 nm | 0.0000 | 61 $\rightarrow$ 69 | 0.29091 |                         |
|                          |                     |        | 62 $\rightarrow$ 69 | 0.16412 |                         |
|                          |                     |        | 63 $\rightarrow$ 68 | 0.10156 |                         |
|                          |                     |        | 63 $\rightarrow$ 69 | 0.40550 |                         |
|                          |                     |        | 64 $\rightarrow$ 70 | 0.32841 |                         |
| $S_0 \rightarrow T_2$    | 2.8848 eV/429.78 nm | 0.0000 | 65 $\rightarrow$ 67 | 0.27304 | $\pi \rightarrow \pi^*$ |
|                          |                     |        | 65 $\rightarrow$ 70 | 0.10117 | $n \rightarrow \pi^*$   |
|                          |                     |        | 66 $\rightarrow$ 67 | 0.61580 |                         |
| $S_0 \rightarrow T_3$    | 2.9503 eV/420.24 nm | 0.0000 | 66 $\rightarrow$ 68 | 0.14080 |                         |
|                          |                     |        | 65 $\rightarrow$ 67 | 0.61495 | $\pi \rightarrow \pi^*$ |
| $S_0 \rightarrow T_4$    | 3.7344 eV/332.00 nm | 0.0000 | 66 $\rightarrow$ 67 | 0.31168 | $n \rightarrow \pi^*$   |
|                          |                     |        | 61 $\rightarrow$ 67 | 0.11309 | $\pi \rightarrow \pi^*$ |
|                          |                     |        | 63 $\rightarrow$ 67 | 0.14144 | $n \rightarrow \pi^*$   |
|                          |                     |        | 64 $\rightarrow$ 67 | 0.66190 |                         |
|                          |                     |        | 60 $\rightarrow$ 67 | 0.13353 | $\pi \rightarrow \pi^*$ |
|                          |                     |        | 61 $\rightarrow$ 67 | 0.20967 | $n \rightarrow \pi^*$   |
|                          |                     |        | 63 $\rightarrow$ 67 | 0.58894 |                         |



|                       |                     |        |       |         |                         |
|-----------------------|---------------------|--------|-------|---------|-------------------------|
| $S_0 \rightarrow T_5$ | 3.8813 eV/319.44 nm | 0.0000 | 64→67 | 0.17594 |                         |
|                       |                     |        | 65→67 | 0.16064 | $\pi \rightarrow \pi^*$ |
|                       |                     |        | 65→68 | 0.13144 | $n \rightarrow \pi^*$   |
|                       |                     |        | 66→67 | 0.10996 |                         |
|                       |                     |        | 66→68 | 0.62775 |                         |
|                       |                     |        | 66→69 | 0.11992 |                         |

<sup>a</sup> Oscillator strength. It is zero for  $S_0 \rightarrow T_n$  transitions.

<sup>b</sup> Only the main configurations are presented.

<sup>c</sup> The CI coefficients are in absolute values.

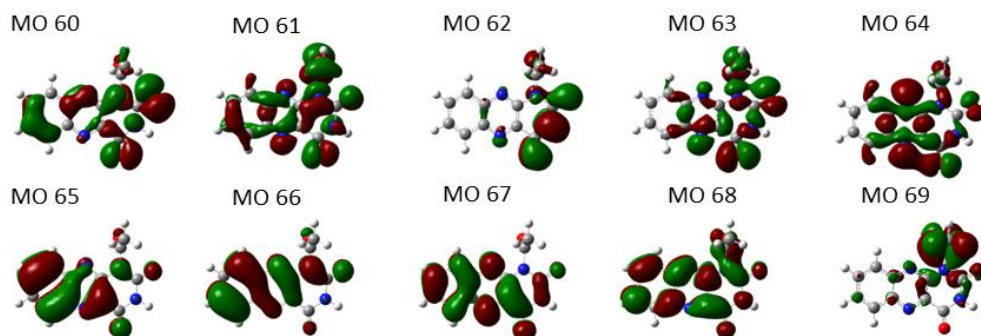

**Figure S2.** Contour plots of wavefunction of states of AAz1 involved in absorption in visible light region. The C, O, N and H are in gray, red, blue and white, respectively. The isovalue is  $\pm 0.02$  a.u.

**Table S3.** Electronic transitions involved in the excitation of AAz3 in visible light region.

| No.                             | Energy              | f <sup>a</sup> | Composition <sup>b</sup> | CI <sup>c</sup> | Character                                     |
|---------------------------------|---------------------|----------------|--------------------------|-----------------|-----------------------------------------------|
| S <sub>0</sub> →S <sub>1</sub>  | 3.4004 eV/364.62 nm | 0.0757         | 66→67                    | 0.69374         | $\pi \rightarrow \pi^*$ $n \rightarrow \pi^*$ |
| S <sub>0</sub> →S <sub>2</sub>  | 3.4582 eV/358.53 nm | 0.0017         | 64→67                    | 0.69470         | $\pi \rightarrow \pi^*$ $n \rightarrow \pi^*$ |
| S <sub>0</sub> →S <sub>3</sub>  | 3.9005 eV/317.87 nm | 0.2714         | 65→67                    | 0.67110         | $\pi \rightarrow \pi^*$                       |
| S <sub>0</sub> →S <sub>4</sub>  | 4.1161 eV/301.21 nm | 0.0002         | 66→68                    | 0.18749         | $n \rightarrow \pi^*$                         |
|                                 |                     |                | 59→67                    | 0.12019         | $\pi \rightarrow \pi^*$                       |
|                                 |                     |                | 62→67                    | 0.39330         | $n \rightarrow \pi^*$                         |
|                                 |                     |                | 63→67                    | 0.54746         |                                               |
| S <sub>0</sub> →S <sub>5</sub>  | 4.5874 eV/270.27 nm | 0.0027         | 62→67                    | 0.56603         | $\pi \rightarrow \pi^*$                       |
|                                 |                     |                | 63→67                    | 0.39676         | $n \rightarrow \pi^*$                         |
| S <sub>0</sub> →S <sub>6</sub>  | 4.8330 eV/256.54 nm | 0.0275         | 60→67                    | 0.13346         | $\pi \rightarrow \pi^*$                       |
|                                 |                     |                | 61→67                    | 0.63748         | $n \rightarrow \pi^*$                         |
|                                 |                     |                | 66→68                    | 0.20103         |                                               |
|                                 |                     |                | 58→67                    | 0.12272         | $\pi \rightarrow \pi^*$                       |
| S <sub>0</sub> →S <sub>7</sub>  | 4.9671 eV/249.61 nm | 0.0035         | 61→69                    | 0.11932         | $n \rightarrow \pi^*$                         |
|                                 |                     |                | 62→69                    | 0.19438         |                                               |
|                                 |                     |                | 63→69                    | 0.26507         |                                               |
|                                 |                     |                | 64→68                    | 0.56219         |                                               |
|                                 |                     |                | 59→69                    | 0.11810         | $\pi \rightarrow \pi^*$                       |
| S <sub>0</sub> →S <sub>8</sub>  | 4.9759 eV/249.17 nm | 0.0006         | 61→69                    | 0.17791         | $n \rightarrow \pi^*$                         |
|                                 |                     |                | 62→69                    | 0.29849         |                                               |
|                                 |                     |                | 63→68                    | 0.10354         |                                               |
|                                 |                     |                | 63→69                    | 0.37366         |                                               |
|                                 |                     |                | 64→68                    | 0.35155         |                                               |
|                                 |                     |                | 64→69                    | 0.21709         |                                               |
|                                 |                     |                | 66→69                    | 0.15681         |                                               |
|                                 |                     |                | 59→67                    | 0.11838         | $\pi \rightarrow \pi^*$                       |
| S <sub>0</sub> →S <sub>9</sub>  | 5.0166 eV/247.15 nm | 0.5879         | 60→67                    | 0.32258         | $n \rightarrow \pi^*$                         |
|                                 |                     |                | 61→67                    | 0.20719         |                                               |
|                                 |                     |                | 65→67                    | 0.12432         |                                               |
|                                 |                     |                | 65→68                    | 0.19814         |                                               |
|                                 |                     |                | 66→68                    | 0.49692         |                                               |
| S <sub>0</sub> →S <sub>10</sub> | 5.0769 eV/244.21 nm | 0.0074         | 63→69                    | 0.10556         | $\pi \rightarrow \pi^*$                       |
|                                 |                     |                | 65→69                    | 0.13860         | $n \rightarrow \pi^*$                         |
|                                 |                     |                | 66→69                    | 0.65807         |                                               |
| S <sub>0</sub> →S <sub>11</sub> | 5.1015 eV/243.03 nm | 0.0000         | 58→67                    | 0.53569         | $\pi \rightarrow \pi^*$                       |
|                                 |                     |                | 59→67                    | 0.39739         | $n \rightarrow \pi^*$                         |
|                                 |                     |                | 60→67                    | 0.12263         |                                               |
|                                 |                     |                | 64→68                    | 0.12726         |                                               |
| S <sub>0</sub> →S <sub>12</sub> | 5.2307 eV/237.03 nm | 0.1436         | 58→67                    | 0.29277         | $\pi \rightarrow \pi^*$                       |
|                                 |                     |                | 59→67                    | 0.27799         | $n \rightarrow \pi^*$                         |
|                                 |                     |                | 60→67                    | 0.31028         |                                               |
|                                 |                     |                | 65→68                    | 0.34323         |                                               |
|                                 |                     |                | 66→68                    | 0.25993         |                                               |
| S <sub>0</sub> →S <sub>13</sub> | 5.2830 eV/234.69 nm | 0.1251         | 58→67                    | 0.27853         | $\pi \rightarrow \pi^*$                       |
|                                 |                     |                | 59→67                    | 0.42069         | $n \rightarrow \pi^*$                         |
|                                 |                     |                | 61→67                    | 0.15097         |                                               |
|                                 |                     |                | 65→68                    | 0.34787         |                                               |
|                                 |                     |                | 66→68                    | 0.22796         |                                               |
|                                 |                     |                | 66→70                    | 0.10610         |                                               |
| S <sub>0</sub> →S <sub>14</sub> | 5.3946 eV/229.83 nm | 0.4372         | 59→67                    | 0.17439         | $\pi \rightarrow \pi^*$                       |
|                                 |                     |                | 60→67                    | 0.48171         | $n \rightarrow \pi^*$                         |
|                                 |                     |                | 65→67                    | 0.11788         |                                               |
|                                 |                     |                | 65→68                    | 0.33290         |                                               |
|                                 |                     |                | 66→68                    | 0.17194         |                                               |
|                                 |                     |                | 66→70                    | 0.22741         |                                               |

|                          |                     |        |                     |         |                         |
|--------------------------|---------------------|--------|---------------------|---------|-------------------------|
| $S_0 \rightarrow S_{15}$ | 5.5177 eV/224.70 nm | 0.0045 | 62 $\rightarrow$ 69 | 0.36229 | $\pi \rightarrow \pi^*$ |
|                          |                     |        | 64 $\rightarrow$ 69 | 0.58650 | $n \rightarrow \pi^*$   |
|                          |                     |        | 65 $\rightarrow$ 69 | 0.12073 |                         |
| $S_0 \rightarrow S_{16}$ | 5.5745 eV/222.41 nm | 0.0002 | 61 $\rightarrow$ 69 | 0.10343 | $\pi \rightarrow \pi^*$ |
|                          |                     |        | 65 $\rightarrow$ 69 | 0.67257 | $n \rightarrow \pi^*$   |
|                          |                     |        | 66 $\rightarrow$ 69 | 0.13238 |                         |
| $S_0 \rightarrow S_{17}$ | 5.7711 eV/214.84 nm | 0.0001 | 59 $\rightarrow$ 67 | 0.12089 | $\pi \rightarrow \pi^*$ |
|                          |                     |        | 62 $\rightarrow$ 68 | 0.38090 | $n \rightarrow \pi^*$   |
|                          |                     |        | 63 $\rightarrow$ 68 | 0.52789 |                         |
|                          |                     |        | 64 $\rightarrow$ 68 | 0.11619 |                         |
| $S_0 \rightarrow S_{18}$ | 5.8211 eV/212.99 nm | 0.0000 | 61 $\rightarrow$ 69 | 0.63158 | $\pi \rightarrow \pi^*$ |
|                          |                     |        | 62 $\rightarrow$ 69 | 0.14690 | $n \rightarrow \pi^*$   |
|                          |                     |        | 63 $\rightarrow$ 69 | 0.20297 |                         |
| $S_0 \rightarrow S_{19}$ | 5.9384 eV/208.78 nm | 0.0771 | 57 $\rightarrow$ 67 | 0.12016 | $\pi \rightarrow \pi^*$ |
|                          |                     |        | 65 $\rightarrow$ 68 | 0.21615 | $n \rightarrow \pi^*$   |
|                          |                     |        | 65 $\rightarrow$ 71 | 0.18167 |                         |
|                          |                     |        | 66 $\rightarrow$ 70 | 0.59756 |                         |
|                          |                     |        | 66 $\rightarrow$ 71 | 0.10135 |                         |
|                          |                     |        | 59 $\rightarrow$ 68 | 0.10498 | $\pi \rightarrow \pi^*$ |
| $S_0 \rightarrow S_{20}$ | 6.0383 eV/205.33 nm | 0.0005 | 61 $\rightarrow$ 68 | 0.12682 | $n \rightarrow \pi^*$   |
|                          |                     |        | 62 $\rightarrow$ 68 | 0.45949 |                         |
|                          |                     |        | 62 $\rightarrow$ 69 | 0.16562 |                         |
|                          |                     |        | 63 $\rightarrow$ 68 | 0.26595 |                         |
|                          |                     |        | 63 $\rightarrow$ 69 | 0.10931 |                         |
|                          |                     |        | 64 $\rightarrow$ 70 | 0.31592 |                         |
|                          |                     |        | 65 $\rightarrow$ 67 | 0.25026 | $\pi \rightarrow \pi^*$ |
| $S_0 \rightarrow T_1$    | 2.5038 eV/495.18 nm | 0.0000 | 66 $\rightarrow$ 67 | 0.62592 | $n \rightarrow \pi^*$   |
|                          |                     |        | 66 $\rightarrow$ 68 | 0.14226 |                         |
|                          |                     |        | 65 $\rightarrow$ 67 | 0.62606 | $\pi \rightarrow \pi^*$ |
| $S_0 \rightarrow T_2$    | 2.8832 eV/430.02 nm | 0.0000 | 66 $\rightarrow$ 67 | 0.28950 | $n \rightarrow \pi^*$   |
|                          |                     |        | 62 $\rightarrow$ 67 | 0.11267 | $\pi \rightarrow \pi^*$ |
| $S_0 \rightarrow T_3$    | 2.9622 eV/418.55 nm | 0.0000 | 63 $\rightarrow$ 67 | 0.17322 | $n \rightarrow \pi^*$   |
|                          |                     |        | 64 $\rightarrow$ 67 | 0.65688 |                         |
|                          |                     |        | 59 $\rightarrow$ 67 | 0.16890 | $\pi \rightarrow \pi^*$ |
| $S_0 \rightarrow T_4$    | 3.7745 eV/328.47 nm | 0.0000 | 62 $\rightarrow$ 67 | 0.36651 | $n \rightarrow \pi^*$   |
|                          |                     |        | 63 $\rightarrow$ 67 | 0.48851 |                         |
|                          |                     |        | 64 $\rightarrow$ 67 | 0.20573 |                         |
|                          |                     |        | 65 $\rightarrow$ 67 | 0.15933 | $\pi \rightarrow \pi^*$ |
| $S_0 \rightarrow T_5$    | 3.8782 eV/319.69 nm | 0.0000 | 65 $\rightarrow$ 68 | 0.14437 | $n \rightarrow \pi^*$   |
|                          |                     |        | 66 $\rightarrow$ 67 | 0.11309 |                         |
|                          |                     |        | 66 $\rightarrow$ 68 | 0.63066 |                         |
|                          |                     |        |                     |         |                         |

<sup>a</sup> Oscillator strength. It is zero for  $S_0 \rightarrow T_n$  transitions.

<sup>b</sup> Only the main configurations are presented.

<sup>c</sup> The CI coefficients are in absolute values.

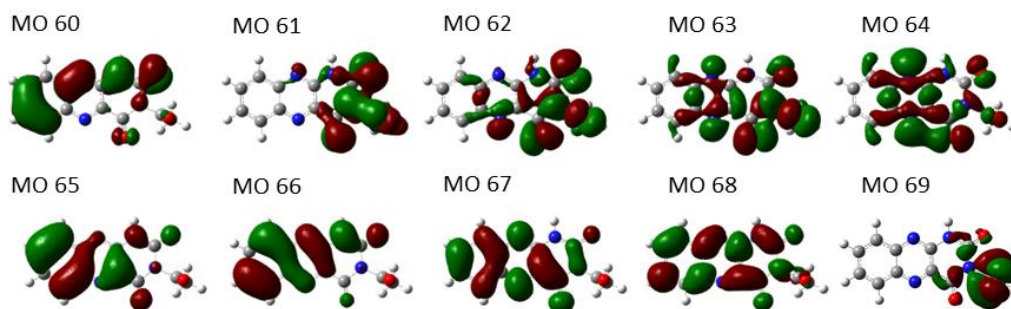

**Figure S3.** Contour plots of wavefunction of states of AAz3 involved in absorption in visible light

region. The C, O, N and H are in gray, red, blue and white, respectively. The isovalue is  $\pm 0.02$  a.u.

**Table S4.** Electronic transitions involved in the excitation of AAz13 in visible light region.

| No.                      | Energy              | $f^a$  | Composition <sup>b</sup> | CI <sup>c</sup> | Character                                     |
|--------------------------|---------------------|--------|--------------------------|-----------------|-----------------------------------------------|
| $S_0 \rightarrow S_1$    | 3.3870 eV/366.06 nm | 0.0671 | 77 $\rightarrow$ 78      | 0.69303         | $\pi \rightarrow \pi^*$ $n \rightarrow \pi^*$ |
| $S_0 \rightarrow S_2$    | 3.4297 eV/361.51 nm | 0.0017 | 75 $\rightarrow$ 78      | 0.69291         | $\pi \rightarrow \pi^*$ $n \rightarrow \pi^*$ |
| $S_0 \rightarrow S_3$    | 3.8779 eV/319.72 nm | 0.2657 | 76 $\rightarrow$ 78      | 0.66946         | $\pi \rightarrow \pi^*$                       |
|                          |                     |        | 77 $\rightarrow$ 79      | 0.14645         | $n \rightarrow \pi^*$                         |
|                          |                     |        | 77 $\rightarrow$ 80      | 0.10979         |                                               |
| $S_0 \rightarrow S_4$    | 4.0997 eV/302.42 nm | 0.0007 | 71 $\rightarrow$ 78      | 0.10672         | $\pi \rightarrow \pi^*$                       |
|                          |                     |        | 72 $\rightarrow$ 78      | 0.11810         | $n \rightarrow \pi^*$                         |
|                          |                     |        | 73 $\rightarrow$ 78      | 0.30039         |                                               |
|                          |                     |        | 74 $\rightarrow$ 78      | 0.59091         |                                               |
| $S_0 \rightarrow S_5$    | 4.5228 eV/274.13 nm | 0.0010 | 73 $\rightarrow$ 78      | 0.59607         | $\pi \rightarrow \pi^*$                       |
|                          |                     |        | 74 $\rightarrow$ 78      | 0.33949         | $n \rightarrow \pi^*$                         |
| $S_0 \rightarrow S_6$    | 4.6300 eV/267.78 nm | 0.0007 | 76 $\rightarrow$ 80      | 0.11415         | $\pi \rightarrow \pi^*$                       |
|                          |                     |        | 77 $\rightarrow$ 79      | 0.39166         | $n \rightarrow \pi^*$                         |
|                          |                     |        | 77 $\rightarrow$ 80      | 0.47005         |                                               |
|                          |                     |        | 77 $\rightarrow$ 81      | 0.21968         |                                               |
| $S_0 \rightarrow S_7$    | 4.8231 eV/257.06 nm | 0.0446 | 70 $\rightarrow$ 78      | 0.14029         | $\pi \rightarrow \pi^*$                       |
|                          |                     |        | 71 $\rightarrow$ 78      | 0.12206         | $n \rightarrow \pi^*$                         |
|                          |                     |        | 72 $\rightarrow$ 78      | 0.60165         |                                               |
|                          |                     |        | 77 $\rightarrow$ 79      | 0.17993         |                                               |
|                          |                     |        | 77 $\rightarrow$ 80      | 0.17290         |                                               |
| $S_0 \rightarrow S_8$    | 4.8965 eV/253.21 nm | 0.0764 | 68 $\rightarrow$ 78      | 0.17052         | $\pi \rightarrow \pi^*$                       |
|                          |                     |        | 71 $\rightarrow$ 78      | 0.51095         | $n \rightarrow \pi^*$                         |
|                          |                     |        | 72 $\rightarrow$ 78      | 0.20063         |                                               |
|                          |                     |        | 73 $\rightarrow$ 78      | 0.13509         |                                               |
|                          |                     |        | 75 $\rightarrow$ 79      | 0.25348         |                                               |
|                          |                     |        | 77 $\rightarrow$ 79      | 0.13108         |                                               |
|                          |                     |        | 77 $\rightarrow$ 80      | 0.15499         |                                               |
| $S_0 \rightarrow S_9$    | 4.9183 eV/252.09 nm | 0.0682 | 71 $\rightarrow$ 78      | 0.21466         | $\pi \rightarrow \pi^*$                       |
|                          |                     |        | 75 $\rightarrow$ 79      | 0.52324         | $n \rightarrow \pi^*$                         |
|                          |                     |        | 75 $\rightarrow$ 80      | 0.27912         |                                               |
|                          |                     |        | 76 $\rightarrow$ 79      | 0.10717         |                                               |
|                          |                     |        | 77 $\rightarrow$ 79      | 0.17658         |                                               |
| $S_0 \rightarrow S_{10}$ | 4.9363 eV/251.17 nm | 0.0003 | 71 $\rightarrow$ 81      | 0.20422         | $\pi \rightarrow \pi^*$                       |
|                          |                     |        | 73 $\rightarrow$ 79      | 0.19743         | $n \rightarrow \pi^*$                         |
|                          |                     |        | 73 $\rightarrow$ 80      | 0.25317         |                                               |
|                          |                     |        | 73 $\rightarrow$ 81      | 0.26928         |                                               |
|                          |                     |        | 74 $\rightarrow$ 79      | 0.12064         |                                               |
|                          |                     |        | 74 $\rightarrow$ 80      | 0.16399         |                                               |
|                          |                     |        | 75 $\rightarrow$ 79      | 0.11110         |                                               |
|                          |                     |        | 75 $\rightarrow$ 80      | 0.39196         |                                               |
|                          |                     |        | 77 $\rightarrow$ 80      | 0.10751         |                                               |
| $S_0 \rightarrow S_{11}$ | 4.9981 eV/248.06 nm | 0.0014 | 71 $\rightarrow$ 79      | 0.18106         | $\pi \rightarrow \pi^*$                       |
|                          |                     |        | 71 $\rightarrow$ 80      | 0.23038         | $n \rightarrow \pi^*$                         |
|                          |                     |        | 72 $\rightarrow$ 81      | 0.11828         |                                               |
|                          |                     |        | 73 $\rightarrow$ 79      | 0.12648         |                                               |
|                          |                     |        | 73 $\rightarrow$ 80      | 0.19936         |                                               |
|                          |                     |        | 73 $\rightarrow$ 81      | 0.27859         |                                               |
|                          |                     |        | 74 $\rightarrow$ 79      | 0.10364         |                                               |
|                          |                     |        | 74 $\rightarrow$ 80      | 0.13019         |                                               |
|                          |                     |        | 74 $\rightarrow$ 81      | 0.18865         |                                               |
|                          |                     |        | 75 $\rightarrow$ 80      | 0.14587         |                                               |
|                          |                     |        | 75 $\rightarrow$ 81      | 0.27062         |                                               |
|                          |                     |        | 77 $\rightarrow$ 80      | 0.17423         |                                               |

|                          |                     |                         |                          |                     |                         |
|--------------------------|---------------------|-------------------------|--------------------------|---------------------|-------------------------|
| $S_0 \rightarrow S_{12}$ | 5.0385 eV/246.07 nm | 0.4347                  | 68 $\rightarrow$ 78      | 0.24664             | $\pi \rightarrow \pi^*$ |
|                          |                     |                         | 70 $\rightarrow$ 78      | 0.31953             | $n \rightarrow \pi^*$   |
|                          |                     |                         | 71 $\rightarrow$ 78      | 0.26490             |                         |
|                          |                     |                         | 72 $\rightarrow$ 78      | 0.19536             |                         |
|                          |                     |                         | 75 $\rightarrow$ 79      | 0.11688             |                         |
|                          |                     |                         | 76 $\rightarrow$ 79      | 0.11291             |                         |
|                          |                     |                         | 77 $\rightarrow$ 79      | 0.31606             |                         |
|                          |                     |                         | 77 $\rightarrow$ 80      | 0.23284             |                         |
|                          |                     |                         | $S_0 \rightarrow S_{13}$ | 5.1480 eV/240.84 nm | 0.0921                  |
| 69 $\rightarrow$ 78      | 0.17962             | $n \rightarrow \pi^*$   |                          |                     |                         |
| 70 $\rightarrow$ 78      | 0.10509             |                         |                          |                     |                         |
| 71 $\rightarrow$ 78      | 0.18330             |                         |                          |                     |                         |
| 76 $\rightarrow$ 80      | 0.12016             |                         |                          |                     |                         |
| 77 $\rightarrow$ 80      | 0.22550             |                         |                          |                     |                         |
| 77 $\rightarrow$ 81      | 0.42386             |                         |                          |                     |                         |
| $S_0 \rightarrow S_{14}$ | 5.1595 eV/240.30 nm | 0.0845                  | 68 $\rightarrow$ 78      | 0.35968             | $\pi \rightarrow \pi^*$ |
|                          |                     |                         | 69 $\rightarrow$ 78      | 0.16994             | $n \rightarrow \pi^*$   |
|                          |                     |                         | 71 $\rightarrow$ 78      | 0.18790             |                         |
|                          |                     |                         | 77 $\rightarrow$ 79      | 0.20088             |                         |
| $S_0 \rightarrow S_{15}$ | 5.2034 eV/238.28 nm | 0.1215                  | 77 $\rightarrow$ 81      | 0.46414             |                         |
|                          |                     |                         | 68 $\rightarrow$ 78      | 0.29187             | $\pi \rightarrow \pi^*$ |
|                          |                     |                         | 70 $\rightarrow$ 78      | 0.32097             | $n \rightarrow \pi^*$   |
|                          |                     |                         | 76 $\rightarrow$ 79      | 0.37849             |                         |
|                          |                     |                         | 76 $\rightarrow$ 80      | 0.22463             |                         |
|                          |                     |                         | 77 $\rightarrow$ 79      | 0.18602             |                         |
|                          |                     |                         | 77 $\rightarrow$ 80      | 0.14033             |                         |
|                          |                     |                         | 77 $\rightarrow$ 82      | 0.10729             |                         |
| $S_0 \rightarrow S_{16}$ | 5.2890 eV/234.42 nm | 0.0361                  | 68 $\rightarrow$ 78      | 0.18665             | $\pi \rightarrow \pi^*$ |
|                          |                     |                         | 69 $\rightarrow$ 78      | 0.56549             | $n \rightarrow \pi^*$   |
|                          |                     |                         | 70 $\rightarrow$ 78      | 0.10726             |                         |
|                          |                     |                         | 72 $\rightarrow$ 78      | 0.14221             |                         |
|                          |                     |                         | 76 $\rightarrow$ 79      | 0.21579             |                         |
|                          |                     |                         | 76 $\rightarrow$ 80      | 0.10063             |                         |
| $S_0 \rightarrow S_{17}$ | 5.3252 eV/232.83 nm | 0.0167                  | 70 $\rightarrow$ 78      | 0.12236             | $\pi \rightarrow \pi^*$ |
|                          |                     |                         | 76 $\rightarrow$ 79      | 0.41037             | $n \rightarrow \pi^*$   |
|                          |                     |                         | 76 $\rightarrow$ 80      | 0.49553             |                         |
|                          |                     |                         | 77 $\rightarrow$ 79      | 0.11319             |                         |
| $S_0 \rightarrow S_{18}$ | 5.3808 eV/230.42 nm | 0.3565                  | 69 $\rightarrow$ 78      | 0.23612             | $\pi \rightarrow \pi^*$ |
|                          |                     |                         | 70 $\rightarrow$ 78      | 0.45006             | $n \rightarrow \pi^*$   |
|                          |                     |                         | 76 $\rightarrow$ 78      | 0.10740             |                         |
|                          |                     |                         | 76 $\rightarrow$ 79      | 0.16303             |                         |
|                          |                     |                         | 76 $\rightarrow$ 80      | 0.31424             |                         |
|                          |                     |                         | 77 $\rightarrow$ 79      | 0.10075             |                         |
|                          |                     |                         | 77 $\rightarrow$ 80      | 0.11134             |                         |
|                          |                     |                         | 77 $\rightarrow$ 82      | 0.19438             |                         |
|                          |                     |                         | 77 $\rightarrow$ 83      | 0.10321             |                         |
|                          |                     |                         | $S_0 \rightarrow S_{19}$ | 5.4120 eV/229.09 nm | 0.0059                  |
| 73 $\rightarrow$ 80      | 0.13730             | $n \rightarrow \pi^*$   |                          |                     |                         |
| 74 $\rightarrow$ 79      | 0.24723             |                         |                          |                     |                         |
| 74 $\rightarrow$ 80      | 0.30936             |                         |                          |                     |                         |
| 75 $\rightarrow$ 79      | 0.28368             |                         |                          |                     |                         |
| 75 $\rightarrow$ 80      | 0.41320             |                         |                          |                     |                         |
| 72 $\rightarrow$ 80      | 0.11828             | $\pi \rightarrow \pi^*$ |                          |                     |                         |
| $S_0 \rightarrow S_{20}$ | 5.6650 eV/218.86 nm | 0.0000                  | 74 $\rightarrow$ 81      | 0.17499             | $n \rightarrow \pi^*$   |
|                          |                     |                         | 75 $\rightarrow$ 81      | 0.26956             |                         |
|                          |                     |                         | 76 $\rightarrow$ 81      | 0.58030             |                         |
| $S_0 \rightarrow T_1$    | 2.5039 eV/495.16 nm | 0.0000                  | 76 $\rightarrow$ 78      | 0.26468             | $\pi \rightarrow \pi^*$ |

|                       |                     |        |  |       |         |                         |
|-----------------------|---------------------|--------|--|-------|---------|-------------------------|
|                       |                     |        |  | 77→78 | 0.61925 | $n \rightarrow \pi^*$   |
|                       |                     |        |  | 77→79 | 0.11855 |                         |
| $S_0 \rightarrow T_2$ | 2.8743 eV/431.36 nm | 0.0000 |  | 76→78 | 0.62039 | $\pi \rightarrow \pi^*$ |
|                       |                     |        |  | 77→78 | 0.30270 | $n \rightarrow \pi^*$   |
| $S_0 \rightarrow T_3$ | 2.9390 eV/421.86 nm | 0.0000 |  | 73→78 | 0.13105 | $\pi \rightarrow \pi^*$ |
|                       |                     |        |  | 75→78 | 0.66190 | $n \rightarrow \pi^*$   |
| $S_0 \rightarrow T_4$ | 3.7694 eV/328.93 nm | 0.0000 |  | 69→78 | 0.13202 | $\pi \rightarrow \pi^*$ |
|                       |                     |        |  | 71→78 | 0.12464 | $n \rightarrow \pi^*$   |
|                       |                     |        |  | 72→78 | 0.12421 |                         |
|                       |                     |        |  | 73→78 | 0.27941 |                         |
|                       |                     |        |  | 74→78 | 0.53616 |                         |
|                       |                     |        |  | 75→78 | 0.16110 |                         |
| $S_0 \rightarrow T_5$ | 3.8661 eV/320.70 nm | 0.0000 |  | 76→78 | 0.15679 | $\pi \rightarrow \pi^*$ |
|                       |                     |        |  | 76→79 | 0.11613 | $n \rightarrow \pi^*$   |
|                       |                     |        |  | 77→78 | 0.11426 |                         |
|                       |                     |        |  | 77→79 | 0.51521 |                         |
|                       |                     |        |  | 77→80 | 0.36897 |                         |

<sup>a</sup> Oscillator strength. It is zero for  $S_0 \rightarrow T_n$  transitions.

<sup>b</sup> Only the main configurations are presented.

<sup>c</sup> The CI coefficients are in absolute values.

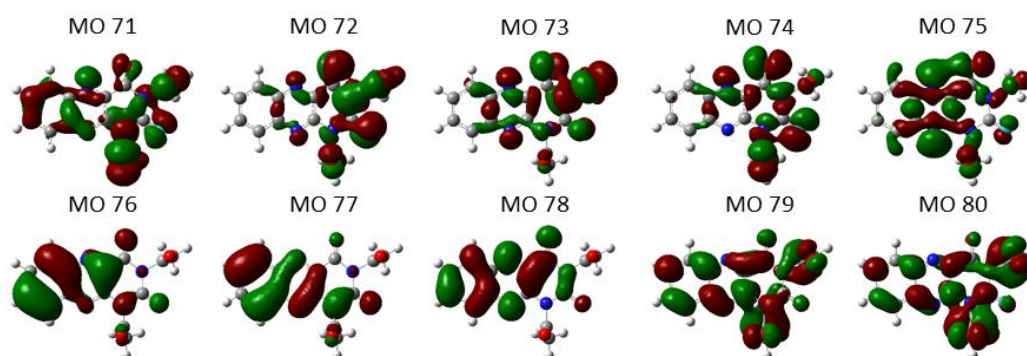

**Figure S4.** Contour plots of wavefunction of states of AAz13 involved in absorption in visible light region. The C, O, N and H are in gray, red, blue and white, respectively. The isovalue is  $\pm 0.02$  a.u.

**Table S5.** Electronic transitions involved in the excitation of AAz13-1 in visible light region.

| No.                   | Energy              | $f^a$  | Composition <sup>b</sup> | CI <sup>c</sup> | Character               |
|-----------------------|---------------------|--------|--------------------------|-----------------|-------------------------|
| $S_0 \rightarrow S_1$ | 3.3872 eV/366.04 nm | 0.0637 | 75 → 78                  | 0.11370         | $\pi \rightarrow \pi^*$ |
|                       |                     |        | 77 → 78                  | 0.68306         | $n \rightarrow \pi^*$   |
| $S_0 \rightarrow S_2$ | 3.4305 eV/361.41 nm | 0.0049 | 75 → 78                  | 0.68130         | $\pi \rightarrow \pi^*$ |
|                       |                     |        | 77 → 78                  | 0.12338         | $n \rightarrow \pi^*$   |
| $S_0 \rightarrow S_3$ | 3.8793 eV/319.61 nm | 0.2656 | 76 → 78                  | 0.66628         | $\pi \rightarrow \pi^*$ |
|                       |                     |        | 77 → 79                  | 0.15131         | $n \rightarrow \pi^*$   |
|                       |                     |        | 77 → 80                  | 0.10369         |                         |
| $S_0 \rightarrow S_4$ | 4.1014 eV/302.30 nm | 0.0003 | 69 → 78                  | 0.10330         | $\pi \rightarrow \pi^*$ |
|                       |                     |        | 72 → 78                  | 0.18826         | $n \rightarrow \pi^*$   |
|                       |                     |        | 74 → 78                  | 0.64825         |                         |
| $S_0 \rightarrow S_5$ | 4.5703 eV/271.28 nm | 0.0018 | 72 → 78                  | 0.10046         | $\pi \rightarrow \pi^*$ |
|                       |                     |        | 73 → 78                  | 0.67996         | $n \rightarrow \pi^*$   |
|                       |                     |        | 74 → 78                  | 0.10245         |                         |
| $S_0 \rightarrow S_6$ | 4.6330 eV/267.61 nm | 0.0046 | 76 → 80                  | 0.12063         | $\pi \rightarrow \pi^*$ |
|                       |                     |        | 77 → 79                  | 0.40719         | $n \rightarrow \pi^*$   |
|                       |                     |        | 77 → 80                  | 0.45163         |                         |
|                       |                     |        | 77 → 81                  | 0.22058         |                         |
| $S_0 \rightarrow S_7$ | 4.7147 eV/262.97 nm | 0.0176 | 71 → 78                  | 0.13530         | $\pi \rightarrow \pi^*$ |
|                       |                     |        | 72 → 78                  | 0.60038         | $n \rightarrow \pi^*$   |

|                          |                     |        |         |         |                         |
|--------------------------|---------------------|--------|---------|---------|-------------------------|
|                          |                     |        | 74 → 78 | 0.19323 |                         |
|                          |                     |        | 77 → 79 | 0.14701 |                         |
|                          |                     |        | 77 → 80 | 0.18471 |                         |
| $S_0 \rightarrow S_8$    | 4.8993 eV/253.07 nm | 0.0037 | 68 → 78 | 0.13766 | $\pi \rightarrow \pi^*$ |
|                          |                     |        | 73 → 80 | 0.12536 | $n \rightarrow \pi^*$   |
|                          |                     |        | 75 → 79 | 0.59402 |                         |
|                          |                     |        | 75 → 80 | 0.16856 |                         |
| $S_0 \rightarrow S_9$    | 4.9341 eV/251.28 nm | 0.0070 | 71 → 78 | 0.11262 | $\pi \rightarrow \pi^*$ |
|                          |                     |        | 71 → 81 | 0.15031 | $n \rightarrow \pi^*$   |
|                          |                     |        | 72 → 79 | 0.11554 |                         |
|                          |                     |        | 72 → 80 | 0.11226 |                         |
|                          |                     |        | 73 → 79 | 0.18242 |                         |
|                          |                     |        | 73 → 80 | 0.25640 |                         |
|                          |                     |        | 73 → 81 | 0.25246 |                         |
|                          |                     |        | 74 → 81 | 0.13847 |                         |
|                          |                     |        | 75 → 80 | 0.41578 |                         |
|                          |                     |        | 77 → 80 | 0.15850 |                         |
| $S_0 \rightarrow S_{10}$ | 4.9781 eV/249.06 nm | 0.1207 | 68 → 78 | 0.14793 | $\pi \rightarrow \pi^*$ |
|                          |                     |        | 71 → 78 | 0.55584 | $n \rightarrow \pi^*$   |
|                          |                     |        | 72 → 78 | 0.21250 |                         |
|                          |                     |        | 76 → 79 | 0.20425 |                         |
|                          |                     |        | 76 → 80 | 0.12377 |                         |
|                          |                     |        | 77 → 79 | 0.14104 |                         |
|                          |                     |        | 77 → 80 | 0.12234 |                         |
| $S_0 \rightarrow S_{11}$ | 5.0108 eV/247.44 nm | 0.1770 | 70 → 78 | 0.17107 | $\pi \rightarrow \pi^*$ |
|                          |                     |        | 71 → 78 | 0.11250 | $n \rightarrow \pi^*$   |
|                          |                     |        | 71 → 79 | 0.11926 |                         |
|                          |                     |        | 71 → 80 | 0.15595 |                         |
|                          |                     |        | 72 → 81 | 0.13727 |                         |
|                          |                     |        | 73 → 80 | 0.16351 |                         |
|                          |                     |        | 73 → 81 | 0.23577 |                         |
|                          |                     |        | 74 → 79 | 0.12904 |                         |
|                          |                     |        | 74 → 80 | 0.18164 |                         |
|                          |                     |        | 75 → 80 | 0.19710 |                         |
|                          |                     |        | 75 → 81 | 0.23668 |                         |
|                          |                     |        | 77 → 79 | 0.28885 |                         |
| $S_0 \rightarrow S_{12}$ | 5.0233 eV/246.82 nm | 0.3383 | 68 → 78 | 0.18465 | $\pi \rightarrow \pi^*$ |
|                          |                     |        | 70 → 78 | 0.27732 | $n \rightarrow \pi^*$   |
|                          |                     |        | 71 → 78 | 0.14126 |                         |
|                          |                     |        | 73 → 80 | 0.13934 |                         |
|                          |                     |        | 73 → 81 | 0.21011 |                         |
|                          |                     |        | 74 → 80 | 0.10036 |                         |
|                          |                     |        | 75 → 79 | 0.12016 |                         |
|                          |                     |        | 75 → 81 | 0.14862 |                         |
|                          |                     |        | 77 → 79 | 0.25033 |                         |
|                          |                     |        | 77 → 80 | 0.29919 |                         |
| $S_0 \rightarrow S_{13}$ | 5.1348 eV/41.46 nm  | 0.0272 | 68 → 78 | 0.24458 | $\pi \rightarrow \pi^*$ |
|                          |                     |        | 76 → 80 | 0.12515 | $n \rightarrow \pi^*$   |
|                          |                     |        | 76 → 81 | 0.10097 |                         |
|                          |                     |        | 77 → 80 | 0.25045 |                         |
|                          |                     |        | 77 → 81 | 0.54908 |                         |
| $S_0 \rightarrow S_{14}$ | 5.1518 eV/240.66 nm | 0.1380 | 68 → 78 | 0.48239 | $\pi \rightarrow \pi^*$ |
|                          |                     |        | 69 → 78 | 0.17365 | $n \rightarrow \pi^*$   |
|                          |                     |        | 71 → 78 | 0.19625 |                         |
|                          |                     |        | 77 → 79 | 0.20262 |                         |
|                          |                     |        | 77 → 81 | 0.32070 |                         |
| $S_0 \rightarrow S_{15}$ | 5.2344 eV/236.87 nm | 0.0960 | 68 → 78 | 0.11202 | $\pi \rightarrow \pi^*$ |

|                                 |                     |        |         |         |      |
|---------------------------------|---------------------|--------|---------|---------|------|
|                                 |                     |        | 69 → 78 | 0.29226 | n→π* |
|                                 |                     |        | 70 → 78 | 0.25360 |      |
|                                 |                     |        | 71 → 78 | 0.16708 |      |
|                                 |                     |        | 76 → 79 | 0.42666 |      |
|                                 |                     |        | 76 → 80 | 0.18359 |      |
|                                 |                     |        | 77 → 79 | 0.14415 |      |
|                                 |                     |        | 77 → 80 | 0.11234 |      |
|                                 |                     |        | 77 → 82 | 0.13050 |      |
| S <sub>0</sub> →S <sub>16</sub> | 5.2799 eV/234.82 nm | 0.0310 | 68 → 78 | 0.27052 | π→π* |
|                                 |                     |        | 69 → 78 | 0.56447 | n→π* |
|                                 |                     |        | 72 → 78 | 0.11608 |      |
|                                 |                     |        | 74 → 79 | 0.10942 |      |
|                                 |                     |        | 76 → 79 | 0.14591 |      |
| S <sub>0</sub> →S <sub>17</sub> | 5.3283 eV/232.69 nm | 0.0284 | 70 → 78 | 0.18859 | π→π* |
|                                 |                     |        | 75 → 79 | 0.11249 | n→π* |
|                                 |                     |        | 75 → 80 | 0.16006 |      |
|                                 |                     |        | 76 → 79 | 0.35783 |      |
|                                 |                     |        | 76 → 80 | 0.50497 |      |
|                                 |                     |        | 77 → 79 | 0.12590 |      |
| S <sub>0</sub> →S <sub>18</sub> | 5.3861 eV/230.19 nm | 0.3461 | 70 → 78 | 0.49111 | π→π* |
|                                 |                     |        | 71 → 78 | 0.13715 | n→π* |
|                                 |                     |        | 76 → 78 | 0.10577 |      |
|                                 |                     |        | 76 → 79 | 0.15266 |      |
|                                 |                     |        | 76 → 80 | 0.31671 |      |
|                                 |                     |        | 77 → 80 | 0.11891 |      |
|                                 |                     |        | 77 → 82 | 0.18997 |      |
|                                 |                     |        | 77 → 83 | 0.10150 |      |
| S <sub>0</sub> →S <sub>19</sub> | 5.4245 eV/228.56 nm | 0.0019 | 71 → 81 | 0.10127 | π→π* |
|                                 |                     |        | 72 → 80 | 0.10588 | n→π* |
|                                 |                     |        | 72 → 81 | 0.10133 |      |
|                                 |                     |        | 73 → 79 | 0.13553 |      |
|                                 |                     |        | 73 → 80 | 0.21607 |      |
|                                 |                     |        | 74 → 79 | 0.20497 |      |
|                                 |                     |        | 74 → 80 | 0.25694 |      |
|                                 |                     |        | 75 → 79 | 0.25520 |      |
|                                 |                     |        | 75 → 80 | 0.41353 |      |
|                                 |                     |        | 76 → 80 | 0.10484 |      |
| S <sub>0</sub> →S <sub>20</sub> | 5.6449 eV/219.64 nm | 0.0003 | 72 → 79 | 0.10708 | π→π* |
|                                 |                     |        | 72 → 80 | 0.20538 | n→π* |
|                                 |                     |        | 73 → 81 | 0.16570 |      |
|                                 |                     |        | 74 → 81 | 0.19956 |      |
|                                 |                     |        | 75 → 81 | 0.52164 |      |
|                                 |                     |        | 76 → 81 | 0.23823 |      |
| S <sub>0</sub> →T <sub>1</sub>  | 2.5038 eV/495.18 nm | 0      | 76 → 78 | 0.26500 | π→π* |
|                                 |                     |        | 77 → 78 | 0.61888 | n→π* |
|                                 |                     |        | 77 → 79 | 0.11959 |      |
| S <sub>0</sub> →T <sub>2</sub>  | 2.8766 eV/431.01 nm | 0      | 76 → 78 | 0.61996 | π→π* |
|                                 |                     |        | 77 → 78 | 0.30317 | n→π* |
| S <sub>0</sub> →T <sub>3</sub>  | 2.9391 eV/421.85 nm | 0      | 72 → 78 | 0.10570 | π→π* |
|                                 |                     |        | 74 → 78 | 0.11111 | n→π* |
|                                 |                     |        | 75 → 78 | 0.66314 |      |
| S <sub>0</sub> →T <sub>4</sub>  | 3.7719 eV/328.70 nm | 0      | 69 → 78 | 0.14644 | π→π* |
|                                 |                     |        | 72 → 78 | 0.19673 | n→π* |
|                                 |                     |        | 74 → 78 | 0.58814 |      |
|                                 |                     |        | 75 → 78 | 0.15896 |      |
| S <sub>0</sub> →T <sub>5</sub>  | 3.8653 eV/320.76 nm | 0      | 76 → 78 | 0.15593 | π→π* |
|                                 |                     |        | 76 → 79 | 0.12096 | n→π* |



|         |         |
|---------|---------|
| 77 → 78 | 0.11488 |
| 77 → 79 | 0.53040 |
| 77 → 80 | 0.34553 |

<sup>a</sup> Oscillator strength. It is zero for  $S_0 \rightarrow T_n$  transitions.

<sup>b</sup> Only the main configurations are presented.

<sup>c</sup> The CI coefficients are in absolute values.

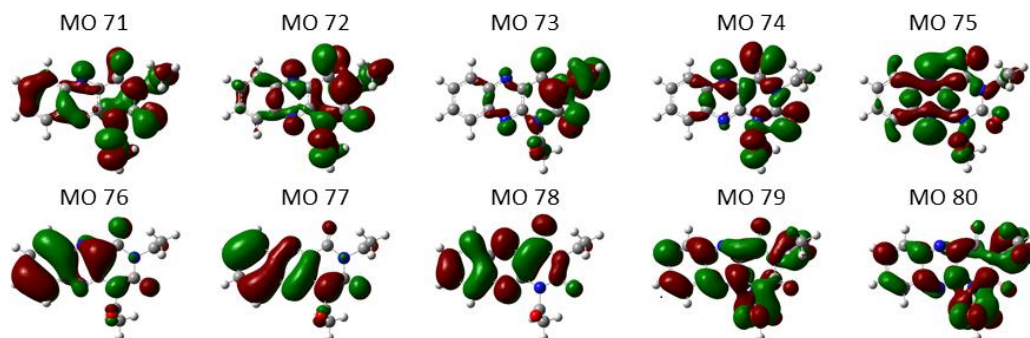

**Figure S5.** Contour plots of wavefunction of states of AAz13-1 involved in absorption in visible light region. The C, O, N and H are in gray, red, blue and white, respectively. The isovalue is  $\pm 0.02$  a.u.

**Table S6.** Electronic transitions involved in the excitation of AzMe in visible light region.

| No.                             | Energy              | f <sup>a</sup> | Composition <sup>b</sup> | CI <sup>c</sup> | Character                                     |
|---------------------------------|---------------------|----------------|--------------------------|-----------------|-----------------------------------------------|
| S <sub>0</sub> →S <sub>1</sub>  | 3.3868 eV/366.08 nm | 0.1004         | 59→60                    | 0.69417         | $\pi \rightarrow \pi^*$ $n \rightarrow \pi^*$ |
| S <sub>0</sub> →S <sub>2</sub>  | 3.4382 eV/360.61 nm | 0.0015         | 56→60                    | 0.11117         | $\pi \rightarrow \pi^*$                       |
|                                 |                     |                | 57→60                    | 0.69423         | $n \rightarrow \pi^*$                         |
| S <sub>0</sub> →S <sub>3</sub>  | 3.9073 eV/317.32 nm | 0.2054         | 58→60                    | 0.67530         | $\pi \rightarrow \pi^*$                       |
|                                 |                     |                | 59→61                    | 0.17158         | $n \rightarrow \pi^*$                         |
| S <sub>0</sub> →S <sub>4</sub>  | 4.0627 eV/305.18 nm | 0.0001         | 53→60                    | 0.13877         | $\pi \rightarrow \pi^*$                       |
|                                 |                     |                | 56→60                    | 0.67234         | $n \rightarrow \pi^*$                         |
| S <sub>0</sub> →S <sub>5</sub>  | 4.7424 eV/261.44 nm | 0.0704         | 54→60                    | 0.24276         | $\pi \rightarrow \pi^*$                       |
|                                 |                     |                | 55→60                    | 0.54867         | $n \rightarrow \pi^*$                         |
|                                 |                     |                | 59→61                    | 0.35192         |                                               |
| S <sub>0</sub> →S <sub>6</sub>  | 4.8916 eV/253.46 nm | 0.0000         | 52→60                    | 0.19142         | $\pi \rightarrow \pi^*$                       |
|                                 |                     |                | 53→60                    | 0.35272         | $n \rightarrow \pi^*$                         |
|                                 |                     |                | 57→61                    | 0.55978         |                                               |
| S <sub>0</sub> →S <sub>7</sub>  | 4.9590 eV/250.02 nm | 0.1523         | 54→60                    | 0.45982         | $\pi \rightarrow \pi^*$                       |
|                                 |                     |                | 55→60                    | 0.37754         | $n \rightarrow \pi^*$                         |
|                                 |                     |                | 58→61                    | 0.27367         |                                               |
|                                 |                     |                | 59→61                    | 0.23625         |                                               |
| S <sub>0</sub> →S <sub>8</sub>  | 4.9767 eV/249.13 nm | 0.0000         | 53→60                    | 0.57259         | $\pi \rightarrow \pi^*$                       |
|                                 |                     |                | 56→60                    | 0.10278         | $n \rightarrow \pi^*$                         |
|                                 |                     |                | 56→61                    | 0.14821         |                                               |
|                                 |                     |                | 57→61                    | 0.36168         |                                               |
| S <sub>0</sub> →S <sub>9</sub>  | 5.0724 eV/244.43 nm | 0.0001         | 52→60                    | 0.67056         | $\pi \rightarrow \pi^*$                       |
|                                 |                     |                | 57→61                    | 0.16425         | $n \rightarrow \pi^*$                         |
| S <sub>0</sub> →S <sub>10</sub> | 5.1193 eV/242.19 nm | 0.6284         | 54→60                    | 0.26438         | $\pi \rightarrow \pi^*$                       |
|                                 |                     |                | 55→60                    | 0.21831         | $n \rightarrow \pi^*$                         |
|                                 |                     |                | 58→60                    | 0.11573         |                                               |
|                                 |                     |                | 58→61                    | 0.29633         |                                               |
|                                 |                     |                | 59→61                    | 0.50927         |                                               |
|                                 |                     |                | 59→62                    | 0.31299         |                                               |
| S <sub>0</sub> →S <sub>11</sub> | 5.3655 eV/231.08 nm | 0.4300         | 54→60                    | 0.36793         | $\pi \rightarrow \pi^*$                       |
|                                 |                     |                | 58→60                    | 0.10478         | $n \rightarrow \pi^*$                         |
|                                 |                     |                | 58→61                    | 0.46594         |                                               |
| S <sub>0</sub> →S <sub>12</sub> | 5.6979 eV/217.60 nm | 0.0000         | 59→61                    | 0.11363         |                                               |
|                                 |                     |                | 59→62                    | 0.31299         |                                               |
|                                 |                     |                | 53→60                    | 0.10717         | $\pi \rightarrow \pi^*$                       |
|                                 |                     |                | 56→61                    | 0.66590         | $n \rightarrow \pi^*$                         |
| S <sub>0</sub> →S <sub>13</sub> | 5.8932 eV/210.38 nm | 0.1230         | 57→61                    | 0.13502         |                                               |
|                                 |                     |                | 51→60                    | 0.10952         | $\pi \rightarrow \pi^*$                       |
|                                 |                     |                | 58→61                    | 0.27458         | $n \rightarrow \pi^*$                         |
|                                 |                     |                | 58→63                    | 0.14819         |                                               |
|                                 |                     |                | 59→62                    | 0.58908         |                                               |
| S <sub>0</sub> →S <sub>14</sub> | 6.0177 eV/206.03 nm | 0.0006         | 53→61                    | 0.12372         | $\pi \rightarrow \pi^*$                       |
|                                 |                     |                | 56→63                    | 0.14350         | $n \rightarrow \pi^*$                         |
|                                 |                     |                | 57→62                    | 0.65735         |                                               |
| S <sub>0</sub> →S <sub>15</sub> | 6.1950 eV/200.14 nm | 0.1126         | 55→61                    | 0.22107         | $\pi \rightarrow \pi^*$                       |
|                                 |                     |                | 59→63                    | 0.64438         | $n \rightarrow \pi^*$                         |
| S <sub>0</sub> →S <sub>16</sub> | 6.2057 eV/199.79 nm | 0.0007         | 53→61                    | 0.32994         | $\pi \rightarrow \pi^*$                       |
|                                 |                     |                | 53→64                    | 0.10126         | $n \rightarrow \pi^*$                         |
|                                 |                     |                | 56→62                    | 0.32400         |                                               |
|                                 |                     |                | 56→63                    | 0.13850         |                                               |
|                                 |                     |                | 57→62                    | 0.15085         |                                               |
|                                 |                     |                | 57→63                    | 0.45632         |                                               |
|                                 |                     |                | 51→60                    | 0.20245         | $\pi \rightarrow \pi^*$                       |
|                                 |                     |                | 54→61                    | 0.15494         | $n \rightarrow \pi^*$                         |
| S <sub>0</sub> →S <sub>17</sub> | 6.2769 eV/197.52 nm | 0.0709         | 55→61                    | 0.50891         |                                               |
|                                 |                     |                | 58→62                    | 0.36337         |                                               |

|                          |                     |        |                     |         |                                               |
|--------------------------|---------------------|--------|---------------------|---------|-----------------------------------------------|
| $S_0 \rightarrow S_{18}$ | 6.3198 eV/196.18 nm | 0.1340 | 59 $\rightarrow$ 63 | 0.10564 |                                               |
|                          |                     |        | 51 $\rightarrow$ 60 | 0.12058 | $\pi \rightarrow \pi^*$                       |
|                          |                     |        | 54 $\rightarrow$ 61 | 0.25076 | $n \rightarrow \pi^*$                         |
|                          |                     |        | 55 $\rightarrow$ 61 | 0.41820 |                                               |
|                          |                     |        | 58 $\rightarrow$ 62 | 0.42869 |                                               |
| $S_0 \rightarrow S_{19}$ | 6.4690 eV/191.66 nm | 0.0006 | 59 $\rightarrow$ 63 | 0.19610 |                                               |
|                          |                     |        | 53 $\rightarrow$ 61 | 0.55065 | $\pi \rightarrow \pi^*$                       |
| $S_0 \rightarrow S_{20}$ | 6.5716 eV/188.67 nm | 0.0003 | 57 $\rightarrow$ 63 | 0.40084 | $n \rightarrow \pi^*$                         |
| $S_0 \rightarrow T_1$    | 2.5365 eV/488.80 nm | 0.0000 | 52 $\rightarrow$ 61 | 0.68581 | $\pi \rightarrow \pi^*$ $n \rightarrow \pi^*$ |
|                          |                     |        | 58 $\rightarrow$ 60 | 0.27880 | $\pi \rightarrow \pi^*$                       |
| $S_0 \rightarrow T_2$    | 2.8600 eV/433.51 nm | 0.0000 | 58 $\rightarrow$ 62 | 0.10742 | $n \rightarrow \pi^*$                         |
|                          |                     |        | 59 $\rightarrow$ 60 | 0.61543 |                                               |
|                          |                     |        | 59 $\rightarrow$ 61 | 0.14077 |                                               |
|                          |                     |        | 58 $\rightarrow$ 60 | 0.60579 | $\pi \rightarrow \pi^*$                       |
|                          |                     |        | 59 $\rightarrow$ 60 | 0.31870 | $n \rightarrow \pi^*$                         |
| $S_0 \rightarrow T_3$    | 2.9572 eV/419.26 nm | 0.0000 | 56 $\rightarrow$ 60 | 0.21859 | $\pi \rightarrow \pi^*$                       |
|                          |                     |        | 57 $\rightarrow$ 60 | 0.65342 | $n \rightarrow \pi^*$                         |
| $S_0 \rightarrow T_4$    | 3.7196 eV/333.33 nm | 0.0000 | 52 $\rightarrow$ 60 | 0.12415 | $\pi \rightarrow \pi^*$                       |
|                          |                     |        | 53 $\rightarrow$ 60 | 0.17458 | $n \rightarrow \pi^*$                         |
|                          |                     |        | 56 $\rightarrow$ 60 | 0.60473 |                                               |
|                          |                     |        | 57 $\rightarrow$ 60 | 0.21623 |                                               |
| $S_0 \rightarrow T_5$    | 3.8641 eV/320.86 nm | 0.0000 | 55 $\rightarrow$ 60 | 0.10225 | $\pi \rightarrow \pi^*$                       |
|                          |                     |        | 58 $\rightarrow$ 60 | 0.17798 | $n \rightarrow \pi^*$                         |
|                          |                     |        | 59 $\rightarrow$ 61 | 0.64565 |                                               |

<sup>a</sup> Oscillator strength. It is zero for  $S_0 \rightarrow T_n$  transitions.

<sup>b</sup> Only the main configurations are presented.

<sup>c</sup> The CI coefficients are in absolute values.

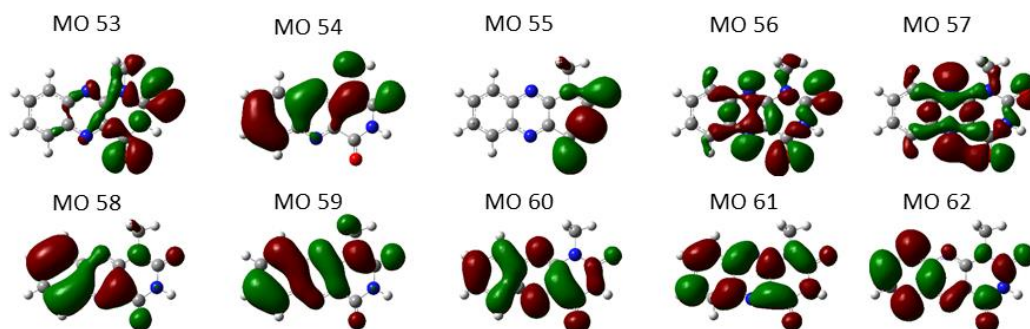

**Figure S6.** Contour plots of wavefunction of states of AzMe involved in absorption in visible light region. The C, O, N and H are in gray, red, blue and white, respectively. The isovalue is  $\pm 0.02$  a.u.

**Table S7.** Electronic transitions involved in the excitation of AAz3Me in visible light region.

| No.                             | Energy              | f <sup>a</sup> | Composition <sup>b</sup> | CI <sup>c</sup> | Character                                     |
|---------------------------------|---------------------|----------------|--------------------------|-----------------|-----------------------------------------------|
| S <sub>0</sub> →S <sub>1</sub>  | 3.3668 eV/368.25 nm | 0.0919         | 70→71                    | 0.69392         | $\pi \rightarrow \pi^*$ $n \rightarrow \pi^*$ |
| S <sub>0</sub> →S <sub>2</sub>  | 3.4335 eV/361.10 nm | 0.0016         | 68→71                    | 0.69520         | $\pi \rightarrow \pi^*$ $n \rightarrow \pi^*$ |
| S <sub>0</sub> →S <sub>3</sub>  | 3.8788 eV/319.65 nm | 0.2361         | 69→71                    | 0.67460         | $\pi \rightarrow \pi^*$                       |
| S <sub>0</sub> →S <sub>4</sub>  | 4.0908 eV/303.08 nm | 0.0001         | 70→72                    | 0.17300         | $n \rightarrow \pi^*$                         |
|                                 |                     |                | 63→71                    | 0.12036         | $\pi \rightarrow \pi^*$                       |
|                                 |                     |                | 66→71                    | 0.21108         | $n \rightarrow \pi^*$                         |
|                                 |                     |                | 67→71                    | 0.64150         |                                               |
| S <sub>0</sub> →S <sub>5</sub>  | 4.5716 eV/271.20 nm | 0.0018         | 66→71                    | 0.64236         | $\pi \rightarrow \pi^*$                       |
|                                 |                     |                | 67→71                    | 0.20684         | $n \rightarrow \pi^*$                         |
|                                 |                     |                | 70→72                    | 0.16099         |                                               |
| S <sub>0</sub> →S <sub>6</sub>  | 4.7727 eV/259.78 nm | 0.0747         | 62→71                    | 0.10102         | $\pi \rightarrow \pi^*$                       |
|                                 |                     |                | 64→71                    | 0.20678         | $n \rightarrow \pi^*$                         |
|                                 |                     |                | 65→71                    | 0.56739         |                                               |
|                                 |                     |                | 68→72                    | 0.10002         |                                               |
|                                 |                     |                | 70→72                    | 0.29950         |                                               |
| S <sub>0</sub> →S <sub>7</sub>  | 4.9087 eV/252.58 nm | 0.0214         | 62→71                    | 0.15986         | $\pi \rightarrow \pi^*$                       |
|                                 |                     |                | 67→72                    | 0.11510         | $n \rightarrow \pi^*$                         |
|                                 |                     |                | 68→72                    | 0.64819         |                                               |
|                                 |                     |                | 70→72                    | 0.10524         |                                               |
| S <sub>0</sub> →S <sub>8</sub>  | 4.9530 eV/250.32 nm | 0.2068         | 64→71                    | 0.41542         | $\pi \rightarrow \pi^*$                       |
|                                 |                     |                | 65→71                    | 0.33878         | $n \rightarrow \pi^*$                         |
|                                 |                     |                | 66→71                    | 0.12030         |                                               |
|                                 |                     |                | 68→72                    | 0.11661         |                                               |
|                                 |                     |                | 69→72                    | 0.25559         |                                               |
|                                 |                     |                | 70→72                    | 0.27084         |                                               |
|                                 |                     |                | 70→73                    | 0.10097         |                                               |
| S <sub>0</sub> →S <sub>9</sub>  | 4.9639 eV/249.77 nm | 0.0046         | 63→73                    | 0.11573         | $\pi \rightarrow \pi^*$                       |
|                                 |                     |                | 65→73                    | 0.17337         | $n \rightarrow \pi^*$                         |
|                                 |                     |                | 66→73                    | 0.35211         |                                               |
|                                 |                     |                | 67→73                    | 0.24401         |                                               |
|                                 |                     |                | 68→73                    | 0.19393         |                                               |
|                                 |                     |                | 70→73                    | 0.45984         |                                               |
| S <sub>0</sub> →S <sub>10</sub> | 5.0184 eV/247.06 nm | 0.0251         | 63→73                    | 0.10688         | $\pi \rightarrow \pi^*$                       |
|                                 |                     |                | 64→71                    | 0.10602         | $n \rightarrow \pi^*$                         |
|                                 |                     |                | 65→73                    | 0.18040         |                                               |
|                                 |                     |                | 66→73                    | 0.28614         |                                               |
|                                 |                     |                | 67→73                    | 0.21127         |                                               |
|                                 |                     |                | 68→73                    | 0.18698         |                                               |
|                                 |                     |                | 69→72                    | 0.10647         |                                               |
|                                 |                     |                | 69→73                    | 0.11953         |                                               |
|                                 |                     |                | 70→72                    | 0.12415         |                                               |
|                                 |                     |                | 70→73                    | 0.48071         |                                               |
| S <sub>0</sub> →S <sub>11</sub> | 5.0682 eV/244.63 nm | 0.0093         | 62→71                    | 0.64707         | $\pi \rightarrow \pi^*$                       |
|                                 |                     |                | 63→71                    | 0.15994         | $n \rightarrow \pi^*$                         |
|                                 |                     |                | 68→72                    | 0.15559         |                                               |
| S <sub>0</sub> →S <sub>12</sub> | 5.0916 eV/243.51 nm | 0.5402         | 63→71                    | 0.15239         | $\pi \rightarrow \pi^*$                       |
|                                 |                     |                | 64→71                    | 0.27197         | $n \rightarrow \pi^*$                         |
|                                 |                     |                | 65→71                    | 0.14545         |                                               |
|                                 |                     |                | 69→71                    | 0.10923         |                                               |
|                                 |                     |                | 69→72                    | 0.29602         |                                               |
|                                 |                     |                | 70→72                    | 0.45446         |                                               |
|                                 |                     |                | 70→73                    | 0.16131         |                                               |
| S <sub>0</sub> →S <sub>13</sub> | 5.2144 eV/237.77 nm | 0.0502         | 62→71                    | 0.15481         | $\pi \rightarrow \pi^*$                       |
|                                 |                     |                | 63→71                    | 0.63135         | $n \rightarrow \pi^*$                         |
|                                 |                     |                | 65→71                    | 0.14702         |                                               |

|                          |                     |        |       |         |                         |
|--------------------------|---------------------|--------|-------|---------|-------------------------|
|                          |                     |        | 67→72 | 0.10063 |                         |
|                          |                     |        | 70→72 | 0.11268 |                         |
| $S_0 \rightarrow S_{14}$ | 5.3371 eV/232.31 nm | 0.4356 | 64→71 | 0.38475 | $\pi \rightarrow \pi^*$ |
|                          |                     |        | 69→71 | 0.10362 | $n \rightarrow \pi^*$   |
|                          |                     |        | 69→72 | 0.47110 |                         |
|                          |                     |        | 70→72 | 0.10915 |                         |
|                          |                     |        | 70→74 | 0.27718 |                         |
| $S_0 \rightarrow S_{15}$ | 5.5085 eV/225.08 nm | 0.0029 | 66→73 | 0.36378 | $\pi \rightarrow \pi^*$ |
|                          |                     |        | 67→73 | 0.11140 | $n \rightarrow \pi^*$   |
|                          |                     |        | 68→73 | 0.57699 |                         |
| $S_0 \rightarrow S_{16}$ | 5.5752 eV/222.39 nm | 0.0003 | 69→73 | 0.68212 | $\pi \rightarrow \pi^*$ |
|                          |                     |        | 70→73 | 0.12192 | $n \rightarrow \pi^*$   |
| $S_0 \rightarrow S_{17}$ | 5.7331 eV/216.26 nm | 0.0001 | 63→71 | 0.13211 | $\pi \rightarrow \pi^*$ |
|                          |                     |        | 66→72 | 0.21190 | $n \rightarrow \pi^*$   |
|                          |                     |        | 67→72 | 0.62422 |                         |
|                          |                     |        | 68→72 | 0.11553 |                         |
| $S_0 \rightarrow S_{18}$ | 5.8122 eV/213.32 nm | 0.0000 | 65→73 | 0.61830 | $\pi \rightarrow \pi^*$ |
|                          |                     |        | 66→73 | 0.22808 | $n \rightarrow \pi^*$   |
|                          |                     |        | 67→73 | 0.16972 |                         |
| $S_0 \rightarrow S_{19}$ | 5.8768 eV/210.97 nm | 0.0737 | 61→71 | 0.11352 | $\pi \rightarrow \pi^*$ |
|                          |                     |        | 69→72 | 0.23774 | $n \rightarrow \pi^*$   |
|                          |                     |        | 69→75 | 0.15478 |                         |
|                          |                     |        | 70→74 | 0.60342 |                         |
| $S_0 \rightarrow S_{20}$ | 6.0100 eV/206.30 nm | 0.0043 | 66→72 | 0.23988 | $\pi \rightarrow \pi^*$ |
|                          |                     |        | 66→73 | 0.26573 | $n \rightarrow \pi^*$   |
|                          |                     |        | 67→73 | 0.50660 |                         |
|                          |                     |        | 68→73 | 0.25529 |                         |
|                          |                     |        | 68→74 | 0.17481 |                         |
| $S_0 \rightarrow T_1$    | 2.5195 eV/492.10 nm | 0.0000 | 69→71 | 0.27772 | $\pi \rightarrow \pi^*$ |
|                          |                     |        | 69→74 | 0.10571 | $n \rightarrow \pi^*$   |
|                          |                     |        | 70→71 | 0.61504 |                         |
|                          |                     |        | 70→72 | 0.14177 |                         |
| $S_0 \rightarrow T_2$    | 2.8511 eV/434.86 nm | 0.0000 | 69→71 | 0.60825 | $\pi \rightarrow \pi^*$ |
|                          |                     |        | 70→71 | 0.31744 | $n \rightarrow \pi^*$   |
| $S_0 \rightarrow T_3$    | 2.9482 eV/420.54 nm | 0.0000 | 67→71 | 0.19306 | $\pi \rightarrow \pi^*$ |
|                          |                     |        | 68→71 | 0.65887 | $n \rightarrow \pi^*$   |
| $S_0 \rightarrow T_4$    | 3.7501 eV/330.62 nm | 0.0000 | 62→71 | 0.11074 | $\pi \rightarrow \pi^*$ |
|                          |                     |        | 63→71 | 0.16309 | $n \rightarrow \pi^*$   |
|                          |                     |        | 66→71 | 0.20360 |                         |
|                          |                     |        | 67→71 | 0.57931 |                         |
|                          |                     |        | 68→71 | 0.20044 |                         |
| $S_0 \rightarrow T_5$    | 3.8512 eV/321.94 nm | 0.0000 | 69→71 | 0.17336 | $\pi \rightarrow \pi^*$ |
|                          |                     |        | 70→72 | 0.63940 | $n \rightarrow \pi^*$   |

<sup>a</sup> Oscillator strength. It is zero for  $S_0 \rightarrow T_n$  transitions.

<sup>b</sup> Only the main configurations are presented.

<sup>c</sup> The CI coefficients are in absolute values.

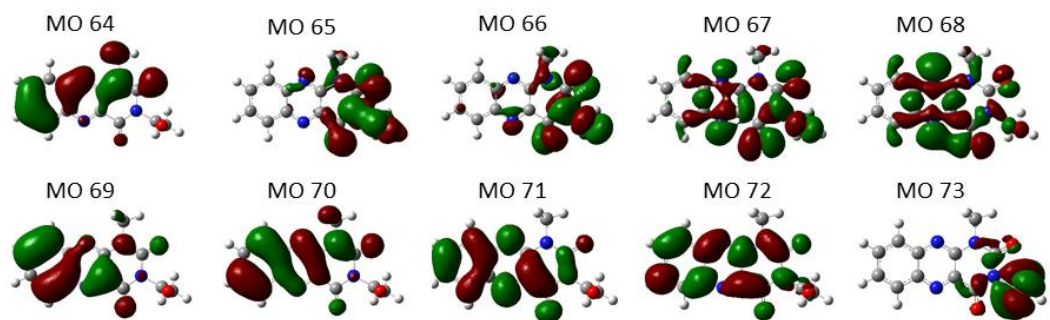

**Figure S7.** Contour plots of wavefunction of states of AAz3Me involved in absorption in visible light region. The C, O, N and H are in gray, red, blue and white, respectively. The isovalue is  $\pm 0.02$  a.u.

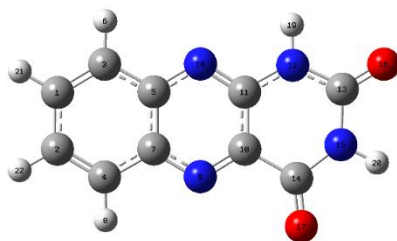

**Figure S8.** The optimized structure of  $S_0$  of Az calculated at B3LYP/6-311g(d) level. The C, O, N and H are in gray, red, blue and white, respectively.

**Table S8.** Mulliken charge analysis of Az in  $S_0$ ,  $S_1$  and  $T_1$ .

| Number <sup>a</sup> | Element | $S_0$   | $S_1$   | $T_1$   | $S_1-S_0^b$ | $T_1-S_0^c$ |
|---------------------|---------|---------|---------|---------|-------------|-------------|
| 1                   | C       | -0.1862 | -0.1882 | -0.1942 | -0.0020     | -0.0080     |
| 2                   | C       | -0.1942 | -0.1669 | -0.1626 | 0.0274      | 0.0316      |
| 3                   | C       | -0.1991 | -0.1696 | -0.1751 | 0.0294      | 0.0239      |
| 4                   | C       | -0.1892 | -0.1716 | -0.2010 | 0.0176      | -0.0119     |
| 5                   | C       | 0.1502  | 0.1451  | 0.1520  | -0.0051     | 0.0018      |
| 6                   | H       | 0.2120  | 0.2313  | 0.2278  | 0.0193      | 0.0158      |
| 7                   | C       | 0.1363  | 0.1560  | 0.1614  | 0.0197      | 0.0251      |
| 8                   | H       | 0.2209  | 0.2402  | 0.2314  | 0.0193      | 0.0104      |
| 9                   | N       | -0.2726 | -0.3438 | -0.3267 | -0.0711     | -0.0540     |
| 10                  | C       | -0.1098 | -0.1199 | -0.1245 | -0.0101     | -0.0148     |
| 11                  | C       | 0.5142  | 0.5107  | 0.5147  | -0.0035     | 0.0006      |
| 12                  | N       | -0.6838 | -0.6440 | -0.6582 | 0.0398      | 0.0257      |
| 13                  | C       | 0.5838  | 0.5829  | 0.5770  | -0.0009     | -0.0068     |
| 14                  | C       | 0.4966  | 0.4623  | 0.4840  | -0.0343     | -0.0126     |
| 15                  | N       | -0.6614 | -0.6645 | -0.6615 | -0.0031     | -0.0001     |
| 16                  | O       | -0.3458 | -0.3416 | -0.3469 | 0.0042      | -0.0012     |
| 17                  | O       | -0.2980 | -0.3325 | -0.3192 | -0.0345     | -0.0212     |
| 18                  | N       | -0.3413 | -0.3785 | -0.3637 | -0.0372     | -0.0225     |
| 19                  | H       | 0.3740  | 0.3758  | 0.3766  | 0.0018      | 0.0026      |
| 20                  | H       | 0.3757  | 0.3711  | 0.3723  | -0.0047     | -0.0034     |
| 21                  | H       | 0.2090  | 0.2189  | 0.2150  | 0.0099      | 0.0060      |
| 22                  | H       | 0.2085  | 0.2266  | 0.2215  | 0.0181      | 0.0130      |

<sup>a</sup> Numbers are consist with the optimized structure in Figure S8.

<sup>b</sup> The difference in Mulliken charges between  $S_1$  and  $S_0$ .

<sup>c</sup> The difference in Mulliken charges between  $T_1$  and  $S_0$ .

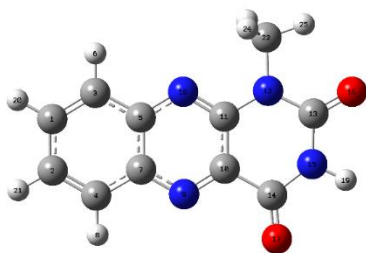

**Figure S9.** The optimized structure of  $S_0$  of AzMe calculated at B3LYP/6-311g(d) level. The C, O, N and H are in gray, red, blue and white, respectively.

**Table S9.** Mulliken charge analysis of AzMe in  $S_0$ ,  $S_1$  and  $T_1$ .

| Number <sup>a</sup> | Element | $S_0$   | $S_1$   | $T_1$   | $S_1-S_0^b$ | $T_1-S_0^c$ |
|---------------------|---------|---------|---------|---------|-------------|-------------|
| 1                   | C       | -0.1870 | -0.1931 | -0.1962 | -0.0061     | -0.0092     |
| 2                   | C       | -0.1948 | -0.1687 | -0.1629 | 0.0261      | 0.0319      |
| 3                   | C       | -0.1951 | -0.1721 | -0.1730 | 0.0230      | 0.0221      |
| 4                   | C       | -0.1906 | -0.1835 | -0.2056 | 0.0071      | -0.0150     |
| 5                   | C       | 0.1507  | 0.1419  | 0.1520  | -0.0088     | 0.0013      |
| 6                   | H       | 0.2104  | 0.2230  | 0.2247  | 0.0126      | 0.0143      |
| 7                   | C       | 0.1308  | 0.1534  | 0.1588  | 0.0226      | 0.0280      |
| 8                   | H       | 0.2202  | 0.2334  | 0.2291  | 0.0133      | 0.0089      |
| 9                   | N       | -0.2736 | -0.3421 | -0.3289 | -0.0685     | -0.0553     |
| 10                  | C       | -0.0931 | -0.1109 | -0.1165 | -0.0178     | -0.0233     |
| 11                  | C       | 0.4853  | 0.4816  | 0.4886  | -0.0037     | 0.0033      |
| 12                  | N       | -0.4657 | -0.4231 | -0.4431 | 0.0426      | 0.0226      |
| 13                  | C       | 0.5793  | 0.5838  | 0.5748  | 0.0044      | -0.0045     |
| 14                  | C       | 0.4985  | 0.4645  | 0.4849  | -0.0340     | -0.0135     |
| 15                  | N       | -0.6606 | -0.6623 | -0.6582 | -0.0018     | 0.0023      |
| 16                  | O       | -0.3574 | -0.3453 | -0.3570 | 0.0121      | 0.0003      |
| 17                  | O       | -0.3010 | -0.3332 | -0.3224 | -0.0322     | -0.0214     |
| 18                  | N       | -0.3594 | -0.3898 | -0.3780 | -0.0304     | -0.0186     |
| 19                  | H       | 0.3743  | 0.3710  | 0.3711  | -0.0033     | -0.0032     |
| 20                  | H       | 0.2077  | 0.2135  | 0.2127  | 0.0057      | 0.0050      |
| 21                  | H       | 0.2075  | 0.2214  | 0.2197  | 0.0139      | 0.0122      |
| 22                  | C       | -0.5110 | -0.5141 | -0.5118 | -0.0031     | -0.0007     |
| 23                  | H       | 0.2343  | 0.2440  | 0.2385  | 0.0097      | 0.0042      |
| 24                  | H       | 0.2343  | 0.2440  | 0.2385  | 0.0097      | 0.0041      |
| 25                  | H       | 0.2560  | 0.2627  | 0.2603  | 0.0067      | 0.0043      |

<sup>a</sup> Numbers are consist with the optimized structure of Figure S9.

<sup>b</sup> The difference of Mulliken charges between  $S_1$  and  $S_0$ .

<sup>c</sup> The difference of Mulliken charges between  $T_1$  and  $S_0$ .

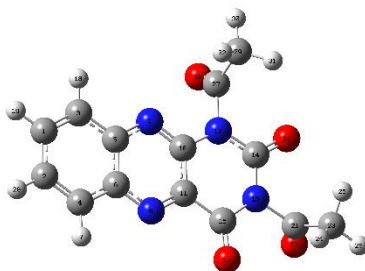

**Figure S10.** The optimized structure of  $S_0$  of AAz13 calculated at B3LYP/6-311g(d) level. The C,



O, N and H are in gray, red, blue and white, respectively.

**Table S10.** Mulliken charge analysis of AAz13 in  $S_0$ ,  $S_1$  and  $T_1$ .

| Number <sup>a</sup> | Element | $S_0$   | $S_1$   | $T_1$   | $S_1-S_0^b$ | $T_1-S_0^c$ |
|---------------------|---------|---------|---------|---------|-------------|-------------|
| 1                   | C       | -0.1860 | -0.1886 | -0.1942 | -0.0026     | -0.0083     |
| 2                   | C       | -0.1930 | -0.1660 | -0.1615 | 0.0270      | 0.0316      |
| 3                   | C       | -0.1951 | -0.1680 | -0.1703 | 0.0271      | 0.0248      |
| 4                   | C       | -0.1919 | -0.1771 | -0.2024 | 0.0148      | -0.0105     |
| 5                   | C       | 0.1527  | 0.1497  | 0.1558  | -0.0031     | 0.0031      |
| 6                   | C       | 0.1366  | 0.1560  | 0.1621  | 0.0195      | 0.0255      |
| 7                   | H       | 0.2224  | 0.2403  | 0.2334  | 0.0179      | 0.0110      |
| 8                   | N       | -0.2724 | -0.3423 | -0.3261 | -0.0700     | -0.0538     |
| 9                   | N       | -0.3645 | -0.4031 | -0.3875 | -0.0387     | -0.0231     |
| 10                  | C       | 0.5034  | 0.5008  | 0.5072  | -0.0026     | 0.0038      |
| 11                  | C       | -0.0716 | -0.0807 | -0.0916 | -0.0090     | -0.0200     |
| 12                  | N       | -0.5221 | -0.4825 | -0.4979 | 0.0396      | 0.0242      |
| 13                  | O       | -0.3691 | -0.3486 | -0.3661 | 0.0206      | 0.0030      |
| 14                  | C       | 0.5955  | 0.5963  | 0.5896  | 0.0008      | -0.0059     |
| 15                  | N       | -0.5000 | -0.5050 | -0.4981 | -0.0050     | 0.0019      |
| 16                  | C       | 0.4773  | 0.4415  | 0.4640  | -0.0358     | -0.0133     |
| 17                  | O       | -0.3104 | -0.3474 | -0.3352 | -0.0370     | -0.0249     |
| 18                  | H       | 0.2158  | 0.2338  | 0.2324  | 0.0179      | 0.0165      |
| 19                  | H       | 0.2108  | 0.2200  | 0.2173  | 0.0092      | 0.0064      |
| 20                  | H       | 0.2101  | 0.2273  | 0.2232  | 0.0172      | 0.0132      |
| 21                  | C       | 0.3842  | 0.3861  | 0.3854  | 0.0019      | 0.0012      |
| 22                  | O       | -0.2272 | -0.2389 | -0.2326 | -0.0117     | -0.0054     |
| 23                  | C       | -0.6758 | -0.6783 | -0.6765 | -0.0025     | -0.0007     |
| 24                  | H       | 0.2516  | 0.2636  | 0.2572  | 0.0121      | 0.0056      |
| 25                  | H       | 0.2463  | 0.2321  | 0.2389  | -0.0142     | -0.0074     |
| 26                  | H       | 0.2478  | 0.2415  | 0.2442  | -0.0063     | -0.0035     |
| 27                  | C       | 0.3818  | 0.3817  | 0.3808  | -0.0001     | -0.0011     |
| 28                  | O       | -0.2265 | -0.2204 | -0.2238 | 0.0061      | 0.0027      |
| 29                  | C       | -0.6749 | -0.6742 | -0.6736 | 0.0007      | 0.0013      |
| 30                  | H       | 0.2473  | 0.2481  | 0.2472  | 0.0007      | -0.0001     |
| 31                  | H       | 0.2541  | 0.2564  | 0.2562  | 0.0023      | 0.0021      |
| 32                  | H       | 0.2429  | 0.2461  | 0.2430  | 0.0032      | 0.0001      |

<sup>a</sup> Numbers are consist with the optimized structure of Figure S10.

<sup>b</sup> The difference of Mulliken charges between  $S_1$  and  $S_0$ .

<sup>c</sup> The difference of Mulliken charges between  $T_1$  and  $S_0$ .

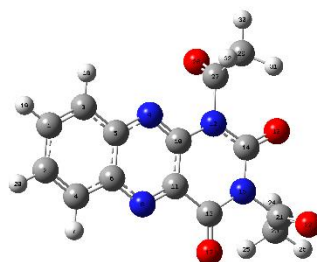

**Figure S11.** The optimized structure of  $S_0$  of AAz13-1 calculated at B3LYP/6-311g(d) level. The C, O, N and H are in gray, red, blue and white, respectively.

**Table S11.** Mulliken charge analysis of AAz13 in  $S_0$ ,  $S_1$  and  $T_1$ .

| Number <sup>a</sup> | Element | $S_0$   | $S_1$   | $T_1$   | $S_1-S_0^b$ | $T_1-S_0^c$ |
|---------------------|---------|---------|---------|---------|-------------|-------------|
| 1                   | C       | -0.1860 | -0.1884 | -0.1941 | -0.0025     | -0.0081     |
| 2                   | C       | -0.1930 | -0.1660 | -0.1617 | 0.0270      | 0.0313      |
| 3                   | C       | -0.1949 | -0.1675 | -0.1701 | 0.0274      | 0.0248      |
| 4                   | C       | -0.1918 | -0.1767 | -0.2021 | 0.0151      | -0.0103     |
| 5                   | C       | 0.1527  | 0.1495  | 0.1557  | -0.0032     | 0.0030      |
| 6                   | C       | 0.1367  | 0.1558  | 0.1620  | 0.0191      | 0.0253      |
| 7                   | H       | 0.2223  | 0.2403  | 0.2334  | 0.0180      | 0.0110      |
| 8                   | N       | -0.2725 | -0.3428 | -0.3261 | -0.0703     | -0.0536     |
| 9                   | N       | -0.3636 | -0.4025 | -0.3866 | -0.0389     | -0.0229     |
| 10                  | C       | 0.5046  | 0.5022  | 0.5084  | -0.0024     | 0.0038      |
| 11                  | C       | -0.0719 | -0.0805 | -0.0918 | -0.0086     | -0.0199     |
| 12                  | N       | -0.5225 | -0.4833 | -0.4985 | 0.0392      | 0.0240      |
| 13                  | O       | -0.3700 | -0.3493 | -0.3674 | 0.0207      | 0.0026      |
| 14                  | C       | 0.5945  | 0.5953  | 0.5884  | 0.0008      | -0.0060     |
| 15                  | N       | -0.4994 | -0.5043 | -0.4974 | -0.0050     | 0.0020      |
| 16                  | C       | 0.4767  | 0.4403  | 0.4634  | -0.0363     | -0.0132     |
| 17                  | O       | -0.3105 | -0.3479 | -0.3352 | -0.0373     | -0.0246     |
| 18                  | H       | 0.2158  | 0.2338  | 0.2323  | 0.0180      | 0.0166      |
| 19                  | H       | 0.2108  | 0.2200  | 0.2172  | 0.0092      | 0.0065      |
| 20                  | H       | 0.2100  | 0.2273  | 0.2232  | 0.0173      | 0.0131      |
| 21                  | C       | 0.3826  | 0.3852  | 0.3841  | 0.0026      | 0.0016      |
| 22                  | O       | -0.2313 | -0.2432 | -0.2367 | -0.0119     | -0.0054     |
| 23                  | C       | -0.6757 | -0.6773 | -0.6763 | -0.0016     | -0.0005     |
| 24                  | H       | 0.2522  | 0.2378  | 0.2449  | -0.0144     | -0.0073     |
| 25                  | H       | 0.2528  | 0.2636  | 0.2577  | 0.0107      | 0.0048      |
| 26                  | H       | 0.2465  | 0.2403  | 0.2431  | -0.0062     | -0.0034     |
| 27                  | C       | 0.3801  | 0.3803  | 0.3793  | 0.0001      | -0.0008     |
| 28                  | O       | -0.2310 | -0.2244 | -0.2284 | 0.0066      | 0.0026      |
| 29                  | C       | -0.6742 | -0.6733 | -0.6731 | 0.0009      | 0.0011      |
| 30                  | H       | 0.2460  | 0.2471  | 0.2461  | 0.0011      | 0.0001      |
| 31                  | H       | 0.2602  | 0.2621  | 0.2622  | 0.0019      | 0.0019      |
| 32                  | H       | 0.2440  | 0.2467  | 0.2439  | 0.0027      | -0.0001     |

<sup>a</sup> Numbers are consist with the optimized structure of Figure S11.

<sup>b</sup> The difference of Mulliken charges between  $S_1$  and  $S_0$ .

<sup>c</sup> The difference of Mulliken charges between  $T_1$  and  $S_0$ .

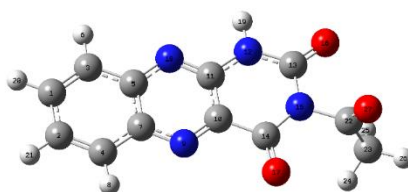

**Figure S12.** The optimized structure of  $S_0$  of AAz3 calculated at B3LYP/6-311g(d) level. The C, O, N and H are in gray, red, blue and white, respectively.

**Table S12.** Mulliken charge analysis of AAz3 in  $S_0$ ,  $S_1$  and  $T_1$ .

| Number <sup>a</sup> | Element | S <sub>0</sub> | S <sub>1</sub> | T <sub>1</sub> | S <sub>1</sub> -S <sub>0</sub> <sup>b</sup> | T <sub>1</sub> -S <sub>0</sub> <sup>c</sup> |
|---------------------|---------|----------------|----------------|----------------|---------------------------------------------|---------------------------------------------|
| 1                   | C       | -0.1860        | -0.1878        | -0.1939        | -0.0018                                     | -0.0079                                     |
| 2                   | C       | -0.1935        | -0.1659        | -0.1620        | 0.0276                                      | 0.0315                                      |
| 3                   | C       | -0.1986        | -0.1682        | -0.1733        | 0.0304                                      | 0.0253                                      |
| 4                   | C       | -0.1910        | -0.1726        | -0.2009        | 0.0184                                      | -0.0100                                     |
| 5                   | C       | 0.1490         | 0.1437         | 0.1502         | -0.0053                                     | 0.0012                                      |
| 6                   | H       | 0.2129         | 0.2332         | 0.2297         | 0.0203                                      | 0.0168                                      |
| 7                   | C       | 0.1411         | 0.1597         | 0.1658         | 0.0186                                      | 0.0247                                      |
| 8                   | H       | 0.2218         | 0.2414         | 0.2329         | 0.0196                                      | 0.0111                                      |
| 9                   | N       | -0.2721        | -0.3417        | -0.3254        | -0.0696                                     | -0.0533                                     |
| 10                  | C       | -0.0940        | -0.1002        | -0.1091        | -0.0062                                     | -0.0152                                     |
| 11                  | C       | 0.5240         | 0.5215         | 0.5266         | -0.0025                                     | 0.0026                                      |
| 12                  | N       | -0.6907        | -0.6507        | -0.6662        | 0.0400                                      | 0.0245                                      |
| 13                  | C       | 0.5896         | 0.5880         | 0.5816         | -0.0017                                     | -0.0080                                     |
| 14                  | C       | 0.4732         | 0.4357         | 0.4604         | -0.0376                                     | -0.0128                                     |
| 15                  | N       | -0.4990        | -0.5053        | -0.4976        | -0.0064                                     | 0.0014                                      |
| 16                  | O       | -0.3555        | -0.3364        | -0.3532        | 0.0191                                      | 0.0023                                      |
| 17                  | O       | -0.3115        | -0.3499        | -0.3362        | -0.0384                                     | -0.0247                                     |
| 18                  | N       | -0.3401        | -0.3738        | -0.3619        | -0.0337                                     | -0.0218                                     |
| 19                  | H       | 0.3745         | 0.3769         | 0.3768         | 0.0024                                      | 0.0023                                      |
| 20                  | H       | 0.2099         | 0.2204         | 0.2166         | 0.0106                                      | 0.0067                                      |
| 21                  | H       | 0.2095         | 0.2281         | 0.2228         | 0.0187                                      | 0.0133                                      |
| 22                  | C       | 0.3876         | 0.3902         | 0.3890         | 0.0026                                      | 0.0014                                      |
| 23                  | C       | -0.6759        | -0.6785        | -0.6763        | -0.0027                                     | -0.0005                                     |
| 24                  | H       | 0.2505         | 0.2631         | 0.2557         | 0.0126                                      | 0.0052                                      |
| 25                  | H       | 0.2493         | 0.2335         | 0.2417         | -0.0158                                     | -0.0076                                     |
| 26                  | H       | 0.2462         | 0.2396         | 0.2428         | -0.0066                                     | -0.0034                                     |
| 27                  | O       | -0.2315        | -0.2442        | -0.2367        | -0.0127                                     | -0.0052                                     |

<sup>a</sup> Numbers are consist with the optimized structure of Figure S12.

<sup>b</sup> The difference of Mulliken charges between S<sub>1</sub> and S<sub>0</sub>.

<sup>c</sup> The difference of Mulliken charges between T<sub>1</sub> and S<sub>0</sub>.

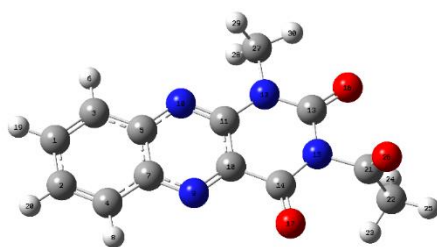

**Figure S13.** The optimized structure of S<sub>0</sub> of AAz3Me calculated at B3LYP/6-311g(d) level. The C, O, N and H are in gray, red, blue and white, respectively.

**Table S13.** Mulliken charge analysis of AAz3Me in S<sub>0</sub>, S<sub>1</sub> and T<sub>1</sub>.

| Number <sup>a</sup> | Element | S <sub>0</sub> | S <sub>1</sub> | T <sub>1</sub> | S <sub>1</sub> -S <sub>0</sub> <sup>b</sup> | T <sub>1</sub> -S <sub>0</sub> <sup>c</sup> |
|---------------------|---------|----------------|----------------|----------------|---------------------------------------------|---------------------------------------------|
| 1                   | C       | -0.1868        | -0.1922        | -0.1957        | -0.0055                                     | -0.0089                                     |
| 2                   | C       | -0.1941        | -0.1680        | -0.1623        | 0.0262                                      | 0.0318                                      |
| 3                   | C       | -0.1946        | -0.1706        | -0.1712        | 0.0241                                      | 0.0235                                      |
| 4                   | C       | -0.1925        | -0.1841        | -0.2054        | 0.0084                                      | -0.0129                                     |
| 5                   | C       | 0.1495         | 0.1409         | 0.1505         | -0.0085                                     | 0.0010                                      |

|    |   |         |         |         |         |         |
|----|---|---------|---------|---------|---------|---------|
| 6  | H | 0.2112  | 0.2250  | 0.2265  | 0.0137  | 0.0153  |
| 7  | C | 0.1360  | 0.1574  | 0.1633  | 0.0213  | 0.0272  |
| 8  | H | 0.2210  | 0.2349  | 0.2309  | 0.0138  | 0.0098  |
| 9  | N | -0.2729 | -0.3407 | -0.3273 | -0.0678 | -0.0544 |
| 10 | C | -0.0787 | -0.0922 | -0.1021 | -0.0135 | -0.0234 |
| 11 | C | 0.4947  | 0.4911  | 0.4994  | -0.0036 | 0.0047  |
| 12 | N | -0.4684 | -0.4265 | -0.4468 | 0.0419  | 0.0216  |
| 13 | C | 0.5828  | 0.5851  | 0.5763  | 0.0023  | -0.0066 |
| 14 | C | 0.4762  | 0.4414  | 0.4639  | -0.0347 | -0.0123 |
| 15 | N | -0.4951 | -0.4981 | -0.4902 | -0.0031 | 0.0049  |
| 16 | O | -0.3685 | -0.3459 | -0.3675 | 0.0226  | 0.0010  |
| 17 | O | -0.3146 | -0.3518 | -0.3385 | -0.0372 | -0.0239 |
| 18 | N | -0.3583 | -0.3870 | -0.3767 | -0.0287 | -0.0184 |
| 19 | H | 0.2087  | 0.2152  | 0.2143  | 0.0065  | 0.0057  |
| 20 | H | 0.2085  | 0.2230  | 0.2211  | 0.0145  | 0.0126  |
| 21 | C | 0.3863  | 0.3873  | 0.3868  | 0.0011  | 0.0005  |
| 22 | C | -0.6755 | -0.6765 | -0.6759 | -0.0010 | -0.0004 |
| 23 | H | 0.2503  | 0.2621  | 0.2535  | 0.0118  | 0.0032  |
| 24 | H | 0.2482  | 0.2343  | 0.2427  | -0.0139 | -0.0055 |
| 25 | H | 0.2451  | 0.2402  | 0.2422  | -0.0050 | -0.0029 |
| 26 | O | -0.2331 | -0.2421 | -0.2372 | -0.0090 | -0.0041 |
| 27 | C | -0.5145 | -0.5177 | -0.5151 | -0.0032 | -0.0007 |
| 28 | H | 0.2343  | 0.2435  | 0.2376  | 0.0092  | 0.0034  |
| 29 | H | 0.2373  | 0.2465  | 0.2409  | 0.0092  | 0.0037  |
| 30 | H | 0.2575  | 0.2655  | 0.2620  | 0.0080  | 0.0045  |

<sup>a</sup> Numbers are consist with the optimized structure of Figure S13.

<sup>b</sup> The difference of Mulliken charges between  $S_1$  and  $S_0$ .

<sup>c</sup> The difference of Mulliken charges between  $T_1$  and  $S_0$ .

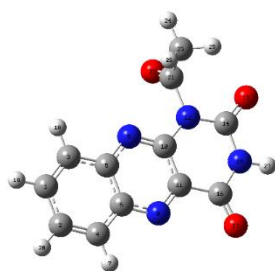

**Figure S14.** The optimized structure of  $S_0$  of AAz1 calculated at B3LYP/6-311g(d) level. The C, O, N and H are in gray, red, blue and white, respectively.

**Table S14.** Mulliken charge analysis of AAz1 in  $S_0$ ,  $S_1$  and  $T_1$ .

| Number <sup>a</sup> | Element | $S_0$   | $S_1$   | $T_1$   | $S_1-S_0^b$ | $T_1-S_0^c$ |
|---------------------|---------|---------|---------|---------|-------------|-------------|
| 1                   | C       | -0.1862 | -0.1890 | -0.1945 | -0.0028     | -0.0083     |
| 2                   | C       | -0.1935 | -0.1668 | -0.1622 | 0.0268      | 0.0314      |
| 3                   | C       | -0.1954 | -0.1689 | -0.1717 | 0.0264      | 0.0237      |
| 4                   | C       | -0.1898 | -0.1756 | -0.2017 | 0.0142      | -0.0118     |
| 5                   | C       | 0.1540  | 0.1511  | 0.1575  | -0.0029     | 0.0035      |
| 6                   | C       | 0.1317  | 0.1521  | 0.1577  | 0.0204      | 0.0259      |
| 7                   | H       | 0.2217  | 0.2393  | 0.2322  | 0.0176      | 0.0105      |
| 8                   | N       | -0.2729 | -0.3444 | -0.3270 | -0.0716     | -0.0541     |

|    |   |         |         |         |         |         |
|----|---|---------|---------|---------|---------|---------|
| 9  | N | -0.3651 | -0.4070 | -0.3885 | -0.0419 | -0.0234 |
| 10 | C | 0.4945  | 0.4920  | 0.4966  | -0.0025 | 0.0021  |
| 11 | C | -0.0870 | -0.0997 | -0.1070 | -0.0126 | -0.0200 |
| 12 | N | -0.5186 | -0.4787 | -0.4936 | 0.0399  | 0.0250  |
| 13 | O | -0.3581 | -0.3504 | -0.3592 | 0.0077  | -0.0012 |
| 14 | C | 0.5913  | 0.5926  | 0.5859  | 0.0012  | -0.0054 |
| 15 | N | -0.6654 | -0.6676 | -0.6643 | -0.0022 | 0.0011  |
| 16 | C | 0.5000  | 0.4661  | 0.4868  | -0.0339 | -0.0132 |
| 17 | O | -0.2954 | -0.3289 | -0.3173 | -0.0335 | -0.0218 |
| 18 | H | 0.2151  | 0.2323  | 0.2310  | 0.0171  | 0.0159  |
| 19 | H | 0.2100  | 0.2186  | 0.2160  | 0.0086  | 0.0060  |
| 20 | H | 0.2093  | 0.2261  | 0.2221  | 0.0168  | 0.0128  |
| 21 | C | 0.3849  | 0.3846  | 0.3839  | -0.0003 | -0.0009 |
| 22 | O | -0.2311 | -0.2249 | -0.2282 | 0.0062  | 0.0029  |
| 23 | C | -0.6746 | -0.6738 | -0.6735 | 0.0008  | 0.0011  |
| 24 | H | 0.2458  | 0.2465  | 0.2459  | 0.0008  | 0.0001  |
| 25 | H | 0.2563  | 0.2564  | 0.2575  | 0.0001  | 0.0012  |
| 26 | H | 0.2425  | 0.2466  | 0.2431  | 0.0041  | 0.0007  |
| 27 | H | 0.3759  | 0.3714  | 0.3723  | -0.0044 | -0.0035 |

<sup>a</sup> Numbers are consist with the optimized structure of Figure S14.

<sup>b</sup> The difference of Mulliken charges between  $S_1$  and  $S_0$ .

<sup>c</sup> The difference of Mulliken charges between  $T_1$  and  $S_0$ .

**Table S15.** The contribution of vibrational normal modes to reorganization energy for  $S_1 \rightarrow S_0$  transition of AZs.

|       | $E_{\text{reorg}}(\text{tol})/\text{cm}^{-1}$ | Mode | Freq/ $\text{cm}^{-1}$ | $E_{\text{reorg}}/\text{cm}^{-1}$ |
|-------|-----------------------------------------------|------|------------------------|-----------------------------------|
| Az    | 2187.52                                       | 11   | 197.25                 | 157.88                            |
|       |                                               | 16   | 416.36                 | 59.06                             |
|       |                                               | 24   | 618.44                 | 347.41                            |
|       |                                               | 43   | 1173.71                | 54.45                             |
|       |                                               | 44   | 1241.18                | 205.73                            |
|       |                                               | 46   | 1277.65                | 146.92                            |
|       |                                               | 49   | 1382.99                | 75.07                             |
|       |                                               | 53   | 1467.04                | 73.71                             |
|       |                                               | 56   | 1598.96                | 506.54                            |
|       |                                               | 57   | 1611.11                | 118.82                            |
|       |                                               | 58   | 1662.09                | 112.31                            |
| AAz1  | 2197.18                                       | 15   | 220.18                 | 130.55                            |
|       |                                               | 30   | 622.23                 | 341.63                            |
|       |                                               | 53   | 1185.78                | 55.82                             |
|       |                                               | 54   | 1244.52                | 229.34                            |
|       |                                               | 56   | 1281.47                | 114.27                            |
|       |                                               | 61   | 1401.45                | 55.49                             |
|       |                                               | 63   | 1458.25                | 51.80                             |
|       |                                               | 69   | 1598.20                | 557.33                            |
|       |                                               | 70   | 1659.17                | 129.96                            |
|       |                                               | 72   | 1780.40                | 52.19                             |
|       |                                               | 73   | 1862.58                | 7.31                              |
| AAz3  | 4804.81                                       | 74   | 3052.43                | 1.50                              |
|       |                                               | 7    | 27.12                  | 65.79                             |
|       |                                               | 15   | 213.62                 | 108.53                            |
|       |                                               | 17   | 261.85                 | 53.98                             |
|       |                                               | 29   | 591.19                 | 79.25                             |
|       |                                               | 31   | 618.38                 | 635.10                            |
|       |                                               | 32   | 668.28                 | 205.96                            |
|       |                                               | 42   | 913.24                 | 56.77                             |
|       |                                               | 43   | 939.10                 | 60.16                             |
|       |                                               | 45   | 1002.65                | 489.59                            |
|       |                                               | 54   | 1241.62                | 279.35                            |
|       |                                               | 56   | 1276.48                | 126.36                            |
|       |                                               | 59   | 1383.65                | 62.32                             |
|       |                                               | 63   | 1459.63                | 132.57                            |
|       |                                               | 68   | 1597.41                | 433.61                            |
| AAz13 | 4338.99                                       | 69   | 1611.55                | 161.57                            |
|       |                                               | 70   | 1662.24                | 107.88                            |
|       |                                               | 71   | 1731.54                | 75.43                             |
|       |                                               | 72   | 1772.57                | 75.14                             |
|       |                                               | 73   | 1864.22                | 789.02                            |
|       |                                               | 74   | 3052.43                | 230.81                            |
|       |                                               | 8    | 28.76                  | 57.07                             |
|       |                                               | 19   | 233.42                 | 84.54                             |
|       |                                               | 36   | 605.48                 | 180.99                            |

|         |          |    |         |        |
|---------|----------|----|---------|--------|
|         |          | 37 | 617.21  | 537.75 |
|         |          | 42 | 763.11  | 134.35 |
|         |          | 50 | 961.84  | 86.44  |
|         |          | 52 | 1000.80 | 296.84 |
|         |          | 53 | 1011.05 | 108.96 |
|         |          | 62 | 1186.90 | 52.12  |
|         |          | 64 | 1245.07 | 301.49 |
|         |          | 66 | 1280.98 | 100.68 |
|         |          | 73 | 1451.09 | 112.95 |
|         |          | 80 | 1590.08 | 81.49  |
|         |          | 81 | 1598.75 | 505.73 |
|         |          | 82 | 1658.89 | 121.48 |
|         |          | 84 | 1761.12 | 112.41 |
|         |          | 85 | 1862.80 | 199.58 |
|         |          | 86 | 1870.01 | 418.44 |
|         |          | 87 | 3052.27 | 215.78 |
| AAz13-1 | 3954.89  | 19 | 233.67  | 84.81  |
|         |          | 36 | 605.71  | 64.63  |
|         |          | 37 | 619.07  | 559.42 |
|         |          | 42 | 762.77  | 134.32 |
|         |          | 50 | 961.26  | 77.38  |
|         |          | 52 | 1000.84 | 239.22 |
|         |          | 53 | 1011.28 | 69.64  |
|         |          | 62 | 1186.88 | 51.34  |
|         |          | 64 | 1245.34 | 302.01 |
|         |          | 66 | 1280.99 | 99.78  |
|         |          | 73 | 1450.86 | 110.19 |
|         |          | 80 | 1589.97 | 83.28  |
|         |          | 81 | 1598.74 | 512.44 |
|         |          | 82 | 1658.88 | 120.49 |
|         |          | 84 | 1761.19 | 107.74 |
|         |          | 85 | 1862.58 | 123.3  |
|         |          | 86 | 1867.79 | 379.14 |
|         |          | 88 | 3052.66 | 173.27 |
| AzMe    | 2032.19  | 12 | 187.69  | 112.20 |
|         |          | 19 | 408.50  | 59.96  |
|         |          | 26 | 621.75  | 264.33 |
|         |          | 47 | 1184.77 | 86.34  |
|         |          | 49 | 1259.65 | 103.15 |
|         |          | 51 | 1296.54 | 205.07 |
|         |          | 53 | 1385.92 | 76.37  |
|         |          | 55 | 1403.67 | 80.87  |
|         |          | 64 | 1599.52 | 496.58 |
|         |          | 65 | 1658.97 | 117.75 |
| AAz3Me  | 3160.394 | 7  | 36.14   | 70.92  |
|         |          | 16 | 201.09  | 90.66  |
|         |          | 32 | 604.16  | 68.26  |

|    |         |        |
|----|---------|--------|
| 33 | 617.04  | 414.41 |
| 43 | 862.84  | 102.40 |
| 47 | 998.95  | 81.41  |
| 48 | 1003.82 | 142.77 |
| 58 | 1232.80 | 78.95  |
| 59 | 1258.43 | 154.56 |
| 61 | 1294.15 | 213.17 |
| 64 | 1387.07 | 76.10  |
| 76 | 1599.25 | 472.90 |
| 77 | 1658.98 | 109.07 |
| 79 | 1759.46 | 67.13  |
| 80 | 1863.49 | 282.65 |
| 81 | 3052.89 | 99.20  |

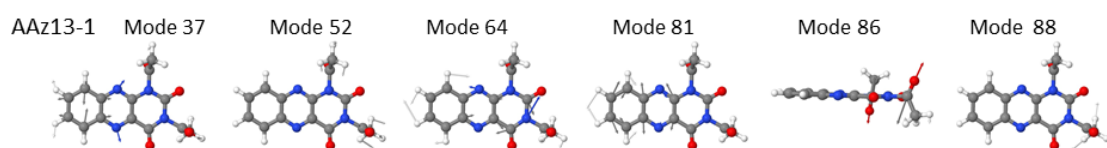

**Figure S15.** The  $E_{\text{reorg}}$  vectorized representation of atomic displacement for the corresponding vibration normal modes of AAz13-1  $S_1 \rightarrow S_0$  transition.



**Table S16.** The contribution of vibrational normal modes to Huang-Rhys factors for  $S_1 \rightarrow S_0$  transitions of AZs.

|       | <b>HR(tol)</b> | <b>Mode</b> | <b>Freq/cm<sup>-1</sup></b> | <b>HR</b> |
|-------|----------------|-------------|-----------------------------|-----------|
| Az    | 2.7006         | 11          | 200.14                      | 0.8002    |
|       |                | 22          | 585.53                      | 0.4225    |
|       |                | 16          | 416.11                      | 0.1413    |
|       |                | 24          | 576.00                      | 0.1686    |
|       |                | 26          | 663.99                      | 0.0773    |
|       |                | 44          | 1194.44                     | 0.1319    |
|       |                | 48          | 1344.67                     | 0.1291    |
|       |                | 51          | 1422.27                     | 0.0601    |
|       |                | 53          | 1438.01                     | 0.0780    |
|       |                | 56          | 1492.71                     | 0.1535    |
|       |                | 57          | 1526.72                     | 0.1044    |
| AAz1  | 3.1307         | 59          | 1705.62                     | 0.1014    |
|       |                | 7           | 46.09                       | 0.1927    |
|       |                | 9           | 69.13                       | 0.0980    |
|       |                | 11          | 118.01                      | 0.2410    |
|       |                | 15          | 215.66                      | 0.5879    |
|       |                | 28          | 572.20                      | 0.1844    |
|       |                | 29          | 617.10                      | 0.1147    |
|       |                | 30          | 580.05                      | 0.2028    |
|       |                | 32          | 646.70                      | 0.1488    |
|       |                | 54          | 1194.89                     | 0.1153    |
|       |                | 62          | 1408.81                     | 0.0994    |
| AAz3  | 9.4948         | 69          | 1486.86                     | 0.2560    |
|       |                | 72          | 1710.58                     | 0.0915    |
|       |                | 7           | 50.07                       | 2.4406    |
|       |                | 8           | 41.16                       | 1.5537    |
|       |                | 9           | 71.57                       | 0.3956    |
|       |                | 15          | 228.44                      | 0.8339    |
|       |                | 22          | 434.10                      | 0.1533    |
|       |                | 26          | 546.17                      | 0.1750    |
|       |                | 28          | 566.81                      | 0.3964    |
|       |                | 31          | 580.17                      | 0.1899    |
|       |                | 32          | 683.03                      | 0.1759    |
| AAz13 | 8.4153         | 33          | 662.36                      | 0.3015    |
|       |                | 43          | 941.26                      | 0.1043    |
|       |                | 45          | 988.70                      | 0.4737    |
|       |                | 53          | 1187.39                     | 0.1440    |
|       |                | 63          | 1433.51                     | 0.1305    |
|       |                | 68          | 1492.10                     | 0.1591    |
|       |                | 71          | 1675.79                     | 0.1501    |
|       |                | 73          | 1844.09                     | 0.5386    |
|       |                | 7           | 45.10                       | 1.1671    |
|       |                | 8           | 33.87                       | 1.4788    |
|       |                | 9           | 49.86                       | 0.4996    |
| 11    | 76.61          | 0.5458      |                             |           |
| 13    | 116.58         | 0.2421      |                             |           |

|         |        |    |         |        |
|---------|--------|----|---------|--------|
|         |        | 19 | 242.96  | 0.7001 |
|         |        | 27 | 434.78  | 0.1180 |
|         |        | 34 | 560.57  | 0.3426 |
|         |        | 37 | 579.30  | 0.1776 |
|         |        | 38 | 631.95  | 0.4721 |
|         |        | 50 | 959.88  | 0.1657 |
|         |        | 52 | 995.38  | 0.3616 |
|         |        | 63 | 1187.42 | 0.1122 |
|         |        | 81 | 1487.09 | 0.1770 |
|         |        | 83 | 1676.89 | 0.1223 |
|         |        | 85 | 1847.04 | 0.4088 |
| AAz13-1 | 7.4815 | 7  | 33.47   | 1.9583 |
|         |        | 8  | 48.84   | 0.6023 |
|         |        | 10 | 57.9    | 0.4920 |
|         |        | 13 | 116.81  | 0.2315 |
|         |        | 19 | 241.78  | 0.6469 |
|         |        | 34 | 560.99  | 0.3603 |
|         |        | 37 | 579.66  | 0.1204 |
|         |        | 38 | 630.01  | 0.3704 |
|         |        | 50 | 959.02  | 0.1461 |
|         |        | 52 | 996.78  | 0.1187 |
|         |        | 53 | 996.14  | 0.2187 |
|         |        | 63 | 1187.52 | 0.1108 |
|         |        | 81 | 1487.9  | 0.2102 |
|         |        | 83 | 1676.62 | 0.1184 |
|         |        | 86 | 1846.92 | 0.3420 |
| AzMe    | 2.4047 | 12 | 189.86  | 0.6035 |
|         |        | 15 | 317.99  | 0.0973 |
|         |        | 19 | 410.64  | 0.1480 |
|         |        | 25 | 611.87  | 0.1164 |
|         |        | 26 | 576.55  | 0.2678 |
|         |        | 28 | 658.82  | 0.0989 |
|         |        | 51 | 1201.21 | 0.1427 |
|         |        | 54 | 1396.32 | 0.1535 |
|         |        | 58 | 1449.36 | 0.1027 |
|         |        | 64 | 1487.95 | 0.1181 |
|         |        | 67 | 1707.96 | 0.0977 |
| AAz3Me  | 5.4036 | 7  | 31.18   | 1.4086 |
|         |        | 8  | 40.83   | 0.4757 |
|         |        | 16 | 209.33  | 0.5983 |
|         |        | 20 | 321.87  | 0.1527 |
|         |        | 31 | 554.97  | 0.3058 |
|         |        | 34 | 636.16  | 0.3769 |
|         |        | 48 | 1005.78 | 0.2952 |
|         |        | 61 | 1199.41 | 0.0998 |
|         |        | 70 | 1449.53 | 0.0951 |
|         |        | 78 | 1676.07 | 0.1195 |

---

---

80

1848.99

0.2182

---

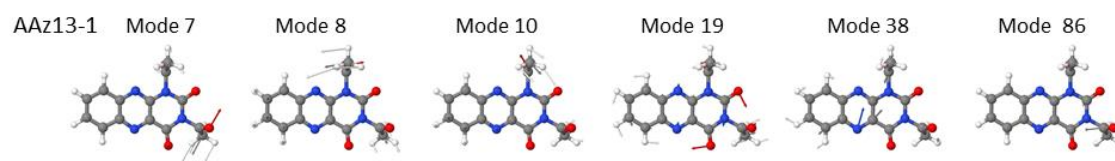

**Figure S16.** Decomposition of calculated Huang-Rhys factors (HRs) to vibrational normal modes of AAz13-1 for  $S_1 \rightarrow S_0$  transition.

**Table S17.** Bond Length (Å) and Dihedral Angle (°) of Az calculated at B3LYP/6-311g(d) level.

|                   | S <sub>0</sub> | S <sub>1</sub> | S <sub>1</sub> →S <sub>0</sub> |
|-------------------|----------------|----------------|--------------------------------|
| L(N1-C10a)        | 1.38           | 1.36           | -0.02                          |
| L(N1-C2)          | 1.38           | 1.40           | 0.02                           |
| L(C2-N3)          | 1.39           | 1.37           | -0.02                          |
| L(N3-C4)          | 1.39           | 1.42           | 0.03                           |
| D(H-N1-C10a-C4a)  | -179.97        | 179.99         | —                              |
| D(H-N1-C2-N3)     | 179.98         | -179.98        | —                              |
| D(C4a-C10a-N1-C2) | 0.01           | -0.01          | 0.01                           |
| D(C10a)N1-C2-N3)  | -0.01          | 0.02           | -0.01                          |
| D(H-N3-C4-C4a)    | 180.00         | -179.99        | —                              |
| D(H-N3-C2-N1)     | -179.99        | 179.98         | —                              |
| D(N1-C2-N3-C4)    | 0.00           | -0.02          | 0.00                           |
| D(C4a-C4-N3-C2)   | 0.01           | 0.01           | 0.01                           |

**Table S18.** Bond Length (Å) and Dihedral Angle (°) of AAz1 calculated at B3LYP/6-311g(d) level.

|                   | S <sub>0</sub> | S <sub>1</sub> | S <sub>1</sub> →S <sub>0</sub> |
|-------------------|----------------|----------------|--------------------------------|
| L(N1-C10a)        | 1.39           | 1.37           | -0.02                          |
| L(N1-C2)          | 1.38           | 1.41           | 0.03                           |
| L(C2-N3)          | 1.39           | 1.36           | -0.03                          |
| L(N3-C4)          | 1.39           | 1.42           | 0.03                           |
| D(C-N1-C10a-C4a)  | 176.03         | 175.86         | -0.17                          |
| D(C-N1-C2-N3)     | -176.60        | -176.39        | 0.21                           |
| D(O-C-N1-C10a)    | -82.64         | -89.26         | -6.62                          |
| D(O-C-N1-C2)      | 95.14          | 88.60          | -6.54                          |
| D(C4a-C10a-N1-C2) | -1.58          | -1.82          | -0.24                          |
| D(C10a)N1-C2-N3)  | 1.07           | 1.36           | 0.29                           |
| D(H-N3-C4-C4a)    | 179.70         | 179.34         | -0.37                          |
| D(H-N3-C2-N1)     | 179.53         | -179.97        |                                |
| D(N1-C2-N3-C4)    | 0.42           | -0.18          | -0.59                          |
| D(C4a-C4-N3-C2)   | -1.20          | -0.46          | 0.73                           |

**Table S19.** Bond Length (Å) and Dihedral Angle (°) of AAz3 calculated at B3LYP/6-311g(d) level.

|                   | S <sub>0</sub> | S <sub>1</sub> | S <sub>1</sub> →S <sub>0</sub> |
|-------------------|----------------|----------------|--------------------------------|
| L(N1-C10a)        | 1.38           | 1.36           | -0.02                          |
| L(N1-C2)          | 1.38           | 1.40           | 0.02                           |
| L(C2-N3)          | 1.40           | 1.38           | -0.02                          |
| L(N3-C4)          | 1.40           | 1.44           | 0.04                           |
| D(H-N1-C10a-C4a)  | 179.37         | 179.43         | 0.06                           |
| D(H-N1-C2-N3)     | 179.69         | -179.56        | —                              |
| D(C4a-C10a-N1-C2) | -0.46          | 1.02           | 1.48                           |
| D(C10a-N1-C2-N3)  | -0.48          | -1.16          | -0.68                          |
| D(C-N3-C4-C4a)    | 177.05         | 178.41         | 1.36                           |
| D(C-N3-C2-N1)     | -177.21        | -177.07        | 0.14                           |
| D(O-C-N3-C2)      | 91.08          | 66.60          | -24.48                         |
| D(O-C-N3-C4)      | -88.06         | -110.53        | -22.47                         |
| D(N1-C2-N3-C4)    | 1.83           | -0.24          | -2.06                          |
| D(C4a-C4-N3-C2)   | -1.97          | 1.58           | 3.56                           |

**Table S20.** Bond Length (Å) and Dihedral Angle (°) of AAz13 calculated at B3LYP/6-311g(d) level.

|                   | S <sub>0</sub> | S <sub>1</sub> | S <sub>1</sub> →S <sub>0</sub> |
|-------------------|----------------|----------------|--------------------------------|
| L(N1-C10a)        | 1.39           | 1.37           | -0.02                          |
| L(N1-C2)          | 1.38           | 1.41           | 0.03                           |
| L(C2-N3)          | 1.39           | 1.37           | -0.02                          |
| L(N3-C4)          | 1.40           | 1.44           | 0.04                           |
| D(C-N1-C10a-C4a)  | 176.81         | 176.28         | -0.53                          |
| D(C-N1-C2-N3)     | -176.30        | -176.36        | -0.06                          |
| D(O-C-N1-C10a)    | -83.67         | -90.34         | -6.67                          |
| D(O-C-N1-C2)      | 94.31          | 88.45          | -5.86                          |
| D(C4a-C10a-N1-C2) | -1.03          | -2.41          | -1.38                          |
| D(C10a-N1-C2-N3)  | 1.58           | 2.36           | 0.78                           |
| D(C-N3-C4-C4a)    | -177.29        | -179.08        | -1.79                          |
| D(C-N3-C2-N1)     | 176.61         | 176.98         | 0.37                           |
| D(O-C-N3-C2)      | -89.19         | -67.72         | 21.47                          |
| D(O-C-N3-C4)      | 89.16          | 109.51         | 20.35                          |
| D(N1-C2-N3-C4)    | -1.54          | 0.04           | 1.58                           |
| D(C4a-C4-N3-C2)   | 0.85           | -2.14          | -2.99                          |

**Table S21.** Bond Length (Å) and Dihedral Angle (°) of AAz13-1 calculated at B3LYP/6-311g(d) level.

|                   | S <sub>0</sub> | S <sub>1</sub> | S <sub>1</sub> →S <sub>0</sub> |
|-------------------|----------------|----------------|--------------------------------|
| L(N1-C10a)        | 1.39           | 1.37           | -0.02                          |
| L(N1-C2)          | 1.38           | 1.41           | 0.03                           |
| L(C2-N3)          | 1.39           | 1.37           | -0.02                          |
| L(N3-C4)          | 1.40           | 1.44           | 0.04                           |
| D(C-N1-C10a-C4a)  | 174.92         | 174.97         | 0.05                           |
| D(C-N1-C2-N3)     | -176.37        | -175.68        | 0.69                           |
| D(O-C-N1-C10a)    | -80.89         | -87.10         | -6.21                          |
| D(O-C-N1-C2)      | 95.92          | 89.36          | -6.56                          |
| D(C4a-C10a-N1-C2) | -1.66          | -1.17          | 0.49                           |
| D(C10a-N1-C2-N3)  | -1.66          | -1.17          | 0.49                           |
| D(C-N3-C4-C4a)    | 176.69         | 177.17         | 0.48                           |
| D(C-N3-C2-N1)     | -177.31        | -176.91        | 0.40                           |
| D(O-C-N3-C2)      | 89.49          | 68.45          | -21.03                         |
| D(O-C-N3-C4)      | -89.96         | -108.50        | -18.54                         |
| D(N1-C2-N3-C4)    | 2.08           | -0.27          | -2.34                          |
| D(C4a-C4-N3-C2)   | -2.69          | 0.53           | 3.22                           |



**Table S22.** Bond Length (Å) and Dihedral Angle (°) of AzMe calculated at B3LYP/6-311g(d) level.

|                   | S <sub>0</sub> | S <sub>1</sub> | S <sub>1</sub> →S <sub>0</sub> |
|-------------------|----------------|----------------|--------------------------------|
| L(N1-C10a)        | 1.39           | 1.37           | -0.01                          |
| L(N1-C2)          | 1.39           | 1.42           | 0.04                           |
| L(C2-N3)          | 1.39           | 1.36           | -0.03                          |
| L(N3-C4)          | 1.39           | 1.42           | 0.03                           |
| D(C-N1-C10a-C4a)  | 179.96         | -179.99        | —                              |
| D(C-N1-C2-N3)     | -180.00        | 179.99         | —                              |
| D(C4a-C10a-N1-C2) | -0.03          | 0.02           | 0.05                           |
| D(C10a)N1-C2-N3)  | 0.00           | -0.01          | -0.01                          |
| D(H-N3-C4-C4a)    | -180.00        | -179.98        | —                              |
| D(H-N3-C2-N1)     | -179.98        | 180.00         | —                              |
| D(N1-C2-N3-C4)    | 0.02           | -0.01          | -0.03                          |
| D(C4a-C4-N3-C2)   | 0.00           | 0.03           | 0.02                           |

**Table S23.** Bond Length (Å) and Dihedral Angle (°) of AAz3Me calculated at B3LYP/6-311g(d) level.

|                   | S <sub>0</sub> | S <sub>1</sub> | S <sub>1</sub> →S <sub>0</sub> |
|-------------------|----------------|----------------|--------------------------------|
| L(N1-C10a)        | 1.39           | 1.37           | -0.02                          |
| L(N1-C2)          | 1.38           | 1.42           | 0.04                           |
| L(C2-N3)          | 1.40           | 1.37           | -0.03                          |
| L(N3-C4)          | 1.39           | 1.43           | 0.04                           |
| D(C-N1-C10a-C4a)  | 179.37         | 179.71         | 0.34                           |
| D(C-N1-C2-N3)     | 179.54         | 179.49         | -0.05                          |
| D(C4a-C10a-N1-C2) | -0.44          | 0.77           | 1.20                           |
| D(C10a)N1-C2-N3)  | -0.65          | -1.54          | -0.89                          |
| D(C-N3-C4-C4a)    | 177.10         | 177.81         | 0.72                           |
| D(C-N3-C2-N1)     | -177.15        | -176.59        | 0.57                           |
| D(O-C-N3-C2)      | 91.53          | 72.72          | -18.81                         |
| D(O-C-N3-C4)      | -87.82         | -105.19        | -17.37                         |
| D(N1-C2-N3-C4)    | 2.11           | 1.07           | -1.04                          |
| D(C4a-C4-N3-C2)   | -2.16          | 0.15           | 2.31                           |

**Table S24.** The contribution of vibrational normal mode to reorganization energy for  $T_1 \rightarrow S_0$  transition of AZs.

|         | $E_{\text{reorg}}(\text{tol})/\text{cm}^{-1}$ | Mode | Freq/ $\text{cm}^{-1}$ | $E_{\text{reorg}}/\text{cm}^{-1}$ |
|---------|-----------------------------------------------|------|------------------------|-----------------------------------|
| Az      | 3281.16                                       | 11   | 197.25                 | 159.71                            |
|         |                                               | 16   | 416.36                 | 63.92                             |
|         |                                               | 24   | 618.44                 | 281.81                            |
|         |                                               | 43   | 1173.71                | 60.48                             |
|         |                                               | 44   | 1241.18                | 154.69                            |
|         |                                               | 49   | 1382.99                | 536.26                            |
|         |                                               | 50   | 1402.71                | 57.46                             |
|         |                                               | 52   | 1455.56                | 79.69                             |
|         |                                               | 53   | 1467.04                | 161.12                            |
|         |                                               | 56   | 1598.96                | 671.77                            |
|         |                                               | 57   | 1611.11                | 685.48                            |
| AAz1    | 3281.49                                       | 15   | 220.18                 | 113.08                            |
|         |                                               | 30   | 622.23                 | 276.19                            |
|         |                                               | 53   | 1185.78                | 70.24                             |
|         |                                               | 54   | 1244.52                | 133.68                            |
|         |                                               | 55   | 1274                   | 57.25                             |
|         |                                               | 58   | 1379.66                | 204.32                            |
|         |                                               | 59   | 1385.77                | 287.99                            |
|         |                                               | 61   | 1401.45                | 121.22                            |
|         |                                               | 62   | 1439.43                | 75.09                             |
|         |                                               | 63   | 1458.25                | 194.27                            |
|         |                                               | 67   | 1532.37                | 76.47                             |
| AAz3    | 3352.83                                       | 69   | 1598.2                 | 1301.73                           |
|         |                                               | 70   | 1659.17                | 84.11                             |
|         |                                               | 15   | 213.62                 | 127.54                            |
|         |                                               | 28   | 565.14                 | 67.34                             |
|         |                                               | 31   | 618.38                 | 295.33                            |
|         |                                               | 52   | 1172.71                | 50.47                             |
|         |                                               | 54   | 1241.62                | 179.17                            |
|         |                                               | 59   | 1383.65                | 530.46                            |
|         |                                               | 63   | 1459.63                | 268.31                            |
|         |                                               | 68   | 1597.41                | 595.14                            |
|         |                                               | 69   | 1611.55                | 765                               |
| AAz13   | 3357.15                                       | 19   | 233.42                 | 91.99                             |
|         |                                               | 34   | 564.68                 | 54.73                             |
|         |                                               | 37   | 617.21                 | 286.59                            |
|         |                                               | 62   | 1186.9                 | 60.57                             |
|         |                                               | 64   | 1245.07                | 166.38                            |
|         |                                               | 68   | 1381.74                | 269.77                            |
|         |                                               | 69   | 1385.18                | 208.75                            |
|         |                                               | 73   | 1451.09                | 303.44                            |
|         |                                               | 79   | 1533.17                | 58.71                             |
|         |                                               | 81   | 1598.75                | 1314.67                           |
|         |                                               | 82   | 1658.89                | 78.3                              |
| AAz13-1 | 3329.35                                       | 19   | 233.67                 | 89.96                             |
|         |                                               | 34   | 566.84                 | 73.01                             |

|        |         |    |         |         |
|--------|---------|----|---------|---------|
|        |         | 37 | 619.07  | 267     |
|        |         | 62 | 1186.88 | 60.56   |
|        |         | 64 | 1245.34 | 165.85  |
|        |         | 68 | 1381.47 | 241.08  |
|        |         | 69 | 1385.07 | 235.81  |
|        |         | 72 | 1401.64 | 53.53   |
|        |         | 73 | 1450.86 | 303.86  |
|        |         | 79 | 1533.13 | 57.69   |
|        |         | 81 | 1598.74 | 1319.65 |
|        |         | 82 | 1658.88 | 77.37   |
| AzMe   | 3131.53 | 12 | 187.69  | 110.87  |
|        |         | 19 | 408.5   | 56.89   |
|        |         | 26 | 621.75  | 262.66  |
|        |         | 47 | 1184.77 | 116.03  |
|        |         | 49 | 1259.65 | 71.36   |
|        |         | 50 | 1274.3  | 62.02   |
|        |         | 53 | 1385.92 | 365.25  |
|        |         | 54 | 1387.17 | 132.99  |
|        |         | 55 | 1403.67 | 169.75  |
|        |         | 56 | 1438.37 | 111.84  |
|        |         | 58 | 1484.85 | 112.26  |
|        |         | 63 | 1591.51 | 285.31  |
|        |         | 64 | 1599.52 | 875.11  |
|        |         | 65 | 1658.97 | 93.15   |
| AAz3Me | 3158.35 | 16 | 201.09  | 87.74   |
|        |         | 31 | 564     | 65.05   |
|        |         | 33 | 617.04  | 194.82  |
|        |         | 58 | 1232.8  | 56.18   |
|        |         | 59 | 1258.43 | 105.99  |
|        |         | 63 | 1386.08 | 183.03  |
|        |         | 64 | 1387.07 | 328.34  |
|        |         | 66 | 1406.44 | 89.38   |
|        |         | 67 | 1438.94 | 142.44  |
|        |         | 70 | 1481.35 | 107.68  |
|        |         | 75 | 1589.67 | 87.02   |
|        |         | 76 | 1599.25 | 1108.31 |
|        |         | 77 | 1658.98 | 86.43   |

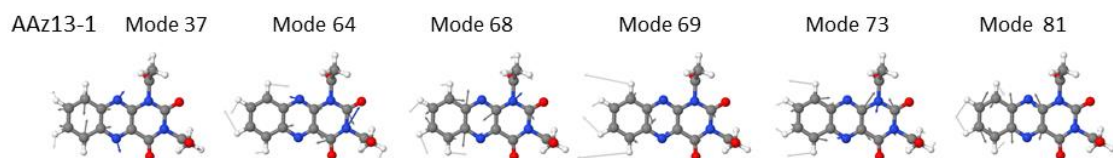

**Figure S17.** The  $E_{\text{reorg}}$  vectorized representation of atomic displacement for the corresponding vibration normal modes of AAz13-1  $T_1 \rightarrow S_0$  transition.

**Table S25.** The contribution of vibrational normal modes of Huang-Rhys factors for T<sub>1</sub>-S<sub>0</sub> transition of AZs.

|       | <b>HR(tol)</b> | <b>Mode</b> | <b>Freq/cm<sup>-1</sup></b> | <b>HR</b> |
|-------|----------------|-------------|-----------------------------|-----------|
| Az    | 3.2467         | 11          | 193.33                      | 0.7656    |
|       |                | 14          | 329.64                      | 0.0712    |
|       |                | 16          | 417.54                      | 0.1530    |
|       |                | 24          | 594.67                      | 0.4881    |
|       |                | 43          | 1192.72                     | 0.0950    |
|       |                | 47          | 1279.61                     | 0.0527    |
|       |                | 48          | 1304.34                     | 0.3341    |
|       |                | 49          | 1380.47                     | 0.1547    |
|       |                | 53          | 1488.96                     | 0.1444    |
|       |                | 56          | 1580.80                     | 0.3669    |
| AAz1  | 3.3473         | 57          | 1359.35                     | 0.2260    |
|       |                | 7           | 37.36                       | 0.0532    |
|       |                | 11          | 117.28                      | 0.3174    |
|       |                | 15          | 210.93                      | 0.4226    |
|       |                | 19          | 328.78                      | 0.0668    |
|       |                | 26          | 522.99                      | 0.0514    |
|       |                | 29          | 591.54                      | 0.2599    |
|       |                | 30          | 609.64                      | 0.1974    |
|       |                | 39          | 780.15                      | 0.0537    |
|       |                | 53          | 1196.49                     | 0.0750    |
|       |                | 54          | 1226.87                     | 0.0585    |
|       |                | 57          | 1293.36                     | 0.0617    |
|       |                | 59          | 1341.65                     | 0.1021    |
| AAz3  | 3.6190         | 63          | 1367.29                     | 0.6737    |
|       |                | 67          | 1522.19                     | 0.0744    |
|       |                | 69          | 1581.23                     | 0.3621    |
|       |                | 7           | 19.80                       | 0.3075    |
|       |                | 11          | 129.56                      | 0.1757    |
|       |                | 15          | 210.15                      | 0.5441    |
|       |                | 19          | 333.30                      | 0.0776    |
|       |                | 22          | 439.52                      | 0.0687    |
|       |                | 28          | 552.18                      | 0.1733    |
|       |                | 29          | 584.29                      | 0.1119    |
|       |                | 31          | 597.37                      | 0.2793    |
|       |                | 53          | 1185.19                     | 0.0923    |
|       |                | 56          | 1307.68                     | 0.3574    |
| AAz13 | 3.7539         | 58          | 1355.11                     | 0.1535    |
|       |                | 61          | 1377.35                     | 0.2070    |
|       |                | 63          | 1484.67                     | 0.1364    |
|       |                | 69          | 1585.41                     | 0.3720    |
|       |                | 71          | 1698.38                     | 0.0514    |
|       |                | 7           | 38.12                       | 0.1038    |
|       |                | 8           | 14.81                       | 0.2298    |
| 13    | 115.14         | 0.3481      |                             |           |
| 19    | 229.99         | 0.3832      |                             |           |
| 24    | 335.96         | 0.0867      |                             |           |

|         |        |    |         |        |
|---------|--------|----|---------|--------|
|         |        | 34 | 553.34  | 0.1426 |
|         |        | 36 | 602.31  | 0.1052 |
|         |        | 37 | 592.19  | 0.1949 |
|         |        | 38 | 626.98  | 0.0929 |
|         |        | 67 | 1294.57 | 0.0516 |
|         |        | 69 | 1338.49 | 0.1238 |
|         |        | 73 | 1365.61 | 0.6300 |
|         |        | 79 | 1521.94 | 0.0631 |
|         |        | 80 | 1192.47 | 0.0972 |
|         |        | 81 | 1584.00 | 0.3657 |
| AAz13-1 | 3.7526 | 7  | 24.93   | 0.3354 |
|         |        | 13 | 115.78  | 0.3165 |
|         |        | 19 | 230.15  | 0.3466 |
|         |        | 34 | 553.98  | 0.1447 |
|         |        | 36 | 590.17  | 0.1957 |
|         |        | 37 | 604.45  | 0.1017 |
|         |        | 69 | 1338.55 | 0.1216 |
|         |        | 73 | 1365.31 | 0.6359 |
|         |        | 81 | 1584.56 | 0.3688 |
| AzMe    | 2.9922 | 12 | 184.09  | 0.5626 |
|         |        | 15 | 316.46  | 0.1454 |
|         |        | 19 | 413.57  | 0.1422 |
|         |        | 23 | 510.37  | 0.0535 |
|         |        | 25 | 585.49  | 0.1297 |
|         |        | 26 | 606.84  | 0.2863 |
|         |        | 40 | 954.10  | 0.0534 |
|         |        | 47 | 1188.27 | 0.1285 |
|         |        | 49 | 1236.29 | 0.0847 |
|         |        | 54 | 1348.41 | 0.1264 |
|         |        | 58 | 1499.08 | 0.0551 |
|         |        | 63 | 1368.45 | 0.5586 |
|         |        | 64 | 1572.96 | 0.2862 |
| AAz3Me  | 3.1417 | 7  | 33.39   | 0.1030 |
|         |        | 13 | 129.35  | 0.1331 |
|         |        | 16 | 197.08  | 0.3925 |
|         |        | 20 | 316.93  | 0.1302 |
|         |        | 24 | 435.14  | 0.0543 |
|         |        | 31 | 553.60  | 0.1385 |
|         |        | 32 | 584.16  | 0.1334 |
|         |        | 33 | 603.17  | 0.1844 |
|         |        | 56 | 1179.92 | 0.1293 |
|         |        | 58 | 1242.98 | 0.0994 |
|         |        | 63 | 1343.42 | 0.1395 |
|         |        | 70 | 1494.48 | 0.0579 |
|         |        | 75 | 1367.50 | 0.5394 |
|         |        | 76 | 1578.05 | 0.3072 |

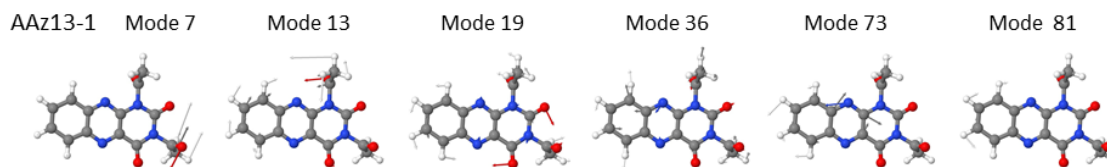

**Figure S18.** Decomposition of calculated Huang-Rhys factors (HRs) to vibrational normal modes of AAz13-1 for  $T_1 \rightarrow S_0$  transition.

**Table S26.** The  $H_{S_0}$  of AZs.

| $H_{S_0}/\text{cm}^{-1}$ | $S_1 \rightarrow T_3$ | $S_1 \rightarrow T_2$ | $S_1 \rightarrow T_1$ | $T_3 \rightarrow S_0$ | $T_2 \rightarrow S_0$ | $T_1 \rightarrow S_0$ |
|--------------------------|-----------------------|-----------------------|-----------------------|-----------------------|-----------------------|-----------------------|
| Az                       | 9.53                  | $1.24 \times 10^{-1}$ | $1.55 \times 10^{-1}$ | $1.04 \times 10^{-1}$ | 8.52                  | $1.71 \times 10^{-1}$ |
| AzMe                     | 8.63                  | $1.44 \times 10^{-1}$ | $1.95 \times 10^{-1}$ | $1.35 \times 10^{-1}$ | 8.10                  | $2.13 \times 10^{-1}$ |
| AAz13                    | 8.57                  | $1.72 \times 10^{-1}$ | $3.40 \times 10^{-1}$ | $9.18 \times 10^{-1}$ | 7.83                  | $2.82 \times 10^{-1}$ |
| AAz13-1                  | 8.53                  | $3.03 \times 10^{-1}$ | $1.38 \times 10^{-1}$ | 1.03                  | 7.75                  | $5.14 \times 10^{-1}$ |
| AAz3                     | 9.11                  | $9.93 \times 10^{-2}$ | $2.44 \times 10^{-1}$ | $2.79 \times 10^{-1}$ | 8.34                  | $2.28 \times 10^{-1}$ |
| AAz3Me                   | 8.27                  | $9.87 \times 10^{-2}$ | $2.49 \times 10^{-1}$ | $7.85 \times 10^{-1}$ | 7.90                  | $2.65 \times 10^{-1}$ |
| AAz1                     | 8.78                  | $2.00 \times 10^{-1}$ | $1.89 \times 10^{-1}$ | 1.10                  | 7.87                  | $4.16 \times 10^{-1}$ |

## References:

1. A. D. Becke, *J. Chem. Phys.*, 1993, **98**, 5648-5652.
2. C. T. Lee, W. T. Yang and R. G. Parr, *Phys. Rev. B*, 1988, **37**, 785-789.
3. R. C. Binning and L. A. Curtiss, *J. Comput. Chem.*, 1990, **11**, 1206-1216.
4. M. M. Francl, W. J. Pietro, W. J. Hehre, J. S. Binkley, M. S. Gordon, D. J. Defrees and J. A. Pople, *J. Chem. Phys.*, 1982, **77**, 3654-3665.
5. V. A. Rassolov, M. A. Ratner, J. A. Pople, P. C. Redfern and L. A. Curtiss, *J. Comput. Chem.*, 2001, **22**, 976-984.
6. F. Weigend and R. Ahlrichs, *Phys. Chem. Chem. Phys.*, 2005, **7**, 3297-3305.
7. F. Weigend, *Phys. Chem. Chem. Phys.*, 2006, **8**, 1057-1065.
8. M. J. Frisch, G. W. Trucks, H. B. Schlegel, G. E. Scuseria, M. A. Robb, J. R. Cheeseman, G. Scalmani, V. Barone, G. A. Petersson, H. Nakatsuji, X. Li, M. Caricato, A. V. Marenich, J. Bloino, B. G. Janesko, R. Gomperts, B. Mennucci, H. P. Hratchian, J. V. Ortiz, A. F. Izmaylov, J. L. Sonnenberg, Williams, F. Ding, F. Lipparini, F. Egidi, J. Goings, B. Peng, A. Petrone, T. Henderson, D. Ranasinghe, V. G. Zakrzewski, J. Gao, N. Rega, G. Zheng, W. Liang, M. Hada, M. Ehara, K. Toyota, R. Fukuda, J. Hasegawa, M. Ishida, T. Nakajima, Y. Honda, O. Kitao, H. Nakai, T. Vreven, K. Throssell, J. A. Montgomery Jr., J. E. Peralta, F. Ogliaro, M. J. Bearpark, J. J. Heyd, E. N. Brothers, K. N. Kudin, V. N. Staroverov, T. A. Keith, R. Kobayashi, J. Normand, K. Raghavachari, A. P. Rendell, J. C. Burant, S. S. Iyengar, J. Tomasi, M. Cossi, J. M. Millam, M. Klene, C. Adamo, R. Cammi, J. W. Ochterski, R. L. Martin, K. Morokuma, O. Farkas, J. B. Foresman and D. J. Fox, *Gaussian 16 A 01*, 2016.
9. O. Vahtras, H. Agren, P. Jorgensen, H. J. A. Jensen, T. Helgaker and J. Olsen, *J. Chem. Phys.*, 1992, **97**, 9178-9187.
10. H. Hettema, H. J. A. Jensen, P. Jorgensen and J. Olsen, *J. Chem. Phys.*, 1992, **97**, 1174-1190.
11. H. Agren, O. Vahtras, H. Koch, P. Jorgensen and T. Helgaker, *J. Chem. Phys.*, 1993, **98**, 6417-6423.
12. J. Olsen, D. L. Yeager and P. Jorgensen, *J. Chem. Phys.*, 1989, **91**, 381-388.
13. P. Jorgensen, H. J. A. Jensen and J. Olsen, *J. Chem. Phys.*, 1988, **89**, 3654-3661.
14. K. Aidas, C. Angeli, K. L. Bak, V. Bakken, R. Bast, L. Boman, O. Christiansen, R. Cimiraglia, S. Coriani, P. Dahle, E. K. Dalskov, U. Ekstrom, T. Enevoldsen, J. J. Eriksen, P. Ettenhuber, B. Fernandez, L. Ferrighi, H. Fliegl, L. Frediani, K. Hald, A. Halkier, C. Hattig, H. Heiberg, T. Helgaker, A. C. Hennum, H. Hettema, E. Hjertenaes, S. Host, I. M. Hoyvik, M. F. Iozzi, B. Jansik, H. J. A. Jensen, D. Jonsson, P. Jorgensen, J. Kauczor, S. Kirpekar, T. Kjrgaard, W. Klopper, S. Knecht, R. Kobayashi, H. Koch, J. Kongsted, A. Krapp, K. Kristensen, A. Ligabue, O. B. Lutnaes, J. I. Melo, K. V. Mikkelsen, R. H. Myhre, C. Neiss, C. B. Nielsen, P. Norman, J. Olsen, J. M. H. Olsen, A. Osted, M. J. Packer, F. Pawłowski, T. B. Pedersen, P. F. Provasi, S. Reine, Z. Rinkevicius, T. A. Ruden, K. Ruud, V. V. Rybkin, P. Salek, C. C. M. Samson, A. S. de Meras, T. Saue, S. P. A. Sauer, B. Schimmelpfennig, K. Sneskov, A. H. Steindal, K. O. Sylvester-Hvid, P. R. Taylor, A. M. Teale, E. I. Tellgren, D. P. Tew, A. J. Thorvaldsen, L. Thogersen, O. Vahtras, M. A. Watson, D. J. D. Wilson, M. Ziolkowski and H. Agren, *Wiley Interdiscip. Rev.-Comput. Mol. Sci.*, 2014, **4**, 269-284.
15. Q. Peng, Y. P. Yi, Z. G. Shuai and J. S. Shao, *J. Chem. Phys.*, 2007, **126**, 114302.
16. Q. Peng, Y. P. Yi, Z. G. Shuai and J. S. Shao, *J. Am. Chem. Soc.*, 2007, **129**, 9333-9339.
17. Y. L. Niu, Q. A. Peng, C. M. Deng, X. Gao and Z. G. Shuai, *J. Phys. Chem. A*, 2010, **114**,



- 7817-7831.
18. Y. Niu, Q. Peng and Z. Shuai, *Sci. China Ser. B-Chem.*, 2008, **51**, 1153-1158.
  19. Q. Peng, Y. L. Niu, Q. H. Shi, X. Gao and Z. G. Shuai, *J. Chem. Theory Comput.*, 2013, **9**, 1132-1143.
  20. Z. G. Shuai, *Chin. J. Chem.*, 2020, **38**, 1223-1232.
  21. Y. L. Niu, W. Q. Li, Q. Peng, H. Geng, Y. P. Yi, L. J. Wang, G. J. Nan, D. Wang and Z. G. Shuai, *Mol. Phys.*, 2018, **116**, 1078-1090.
  22. Z. G. Shuai and Q. Peng, *Phys. Rep.-Rev. Sec. Phys. Lett.*, 2014, **537**, 123-156.
  23. Z. G. Shuai and Q. Peng, *Natl. Sci. Rev.*, 2017, **4**, 224-239.
  24. Y. Niu, Q. Peng, C. Deng, X. Gao and Z. Shuai, *J. Phys. Chem. A*, 2010, **114**, 7817-7831.
  25. T. Lu and F. W. Chen, *J. Comput. Chem.*, 2012, **33**, 580-592.
  26. S. Miertus, E. Scrocco and J. Tomasi, *Chem. Phys.*, 1981, **55**, 117-129.
  27. R. Cammi and B. Mennucci, *J. Chem. Phys.*, 1999, **110**, 9877-9886.
  28. J. Tomasi, B. Mennucci and R. Cammi, *Chem. Rev.*, 2005, **105**, 2999-3093.
